# Supplementary material
Source: HighWire-hosted journal article supplement (doi:10.1101/rna.079840.123)
Supplement: Supplemental_Figure_Legends.docx [file Supplemental_Figure_Legends.docx]

**Supplemental Figure S1. Schematic representation of the biologically-relevant in cell three-plasmid *trans* complementation assay of FIV.** The virus particles made by the FIV Gag/Pro/Pol expression plasmid (MB22) were pseudotyped by the vesicular stomatitis virus envelope glycoprotein (VSV-G) expressed by MD.G and allowed packaging of the FIV sub-genomic wild type (TR394) or mutant transfer vector RNA, provided they contained a functional packaging signal (ψ). Infectious virus particles were produced by HEK293T cells that have been co-transfected with the above-mentioned three plasmids. RNA from these cells was fractionated into nuclear and cytoplasmic components. Real time-qPCR was used to monitor the expression of each transfer vector RNA in the cytoplasmic fractions as well as determine how much RNA was packaged into the virus particles after extraction from the transfected HEK293Tcells. To evaluate the propagation of the packaged RNA within the produced virions in a single round of replication assay, the viral supernatants from HEK293T cells were used to infect target HeLa cells and infected cells were selected as colonies using hygromycin antibiotic in media.

**Supplemental Figure S2. Importance of U5/*gag* LRI complementary sequences towards FIV RNA packaging and propagation.** Schematic representation of the hSHAPE-validated secondary structure model of the FIV packaging signal RNA presented in this study.The U5/*gag* LRI is boxed. **A.** Base pairing of the wild type (WT) and mutated complementary strands are shown as an inset. In this mutation, the two stems of the LRI were swapped and flipped while maintaining complementarity as well as the number of Watson-Crick and Wobble base pairing. **B & C.** RNA packaging and propagation efficiency, respectively, of the mutant clone (AD117) and WT.

**Supplemental Figure S3. Characterization of the FIV Pr50Gag** **protein by gel electrophoresis and dynamic light scattering (DLS). A.** Coomassie brilliant blue stained SDS-PAGE showing the presence of the purest form of the recombinant full-length FIV Pr50Gag-His6-tag fusion protein **B.** Western blot analyses of the purified protein using α-His6 and FIV α-p24 monoclonal antibodies, respectively, using equal amounts of protein. **C & D.** Characterization of the FIV Gag protein by dynamic light scattering (DLS) **C.** Protein volume *versus* the hydrodynamic diameter, and **D.** protein number *versus* the hydrodynamicdiameter.
