# Supplementary material
Source: HighWire-hosted journal article supplement (doi:10.1101/rna.079840.123)
Supplement: Supplemental_TableS1.docx [file Supplemental_TableS1.docx]

| **Primers used for the introduction of mutations and construction of clones.** | | | | | |
| --- | --- | --- | --- | --- | --- |
| **Mutation**  **Names** | **Primers** | ***S or AS** | **Sequence** | ****Nucleotide position** | **Template**  **DNA** |
| AD101 | OTR 1503 | AS | 5’ GAC AGG GTT CAA TCT CAA AGA GGG AGT GTA TCT GTG GGA GCC TCA AGG 3’ | 295-248 | TR394  (Browning *et al*., 2001) |
| OTR 1504 | S | 5’ TTT GAG ATT GAA CCC TGT CGA GTA 3’ | 277-300 | TR394 |
| AD102 | OTR 1505 | AS | 5’ GAT ACT CGA CAG GGT TCA AAA GGA AAT ATT TAT TGT ATC TGT GGG AGC C 3’ | 302-254 | TR394 |
| OTR 1506 | S | 5’ TTG AAC CCT GTC GAG TAT CTG TG 3’ | 284-306 | TR394 |
| AD103 | OTR 1507 | AS | 5’ TTA ATG GCC ATT TTC CAA AAG GGC CCC TGT CCA TTC CCC ATG TT 3’ | 668-625 | TR394 |
| OTR 1508 | S | 5’ TTG GAA AAT GGC CAT TAA GAG ATG T 3’ | 651-675 | TR394 |
| AD104 | OTR 1509 | AS | 5’ GCA ACA TTA CTA CAT CTC TTA AGG GAA AGT TTC CAA TCT CGC CCC TGT CCA 3’ | 686-636 | TR394 |
| OTR 1510 | S | 5’ TAA GAG ATG TAG TAA TGT TGC TG 3’ | 665-688 | TR394 |
| AD105 | OTR 1511 | AS | 5’ CAA CAT TAC TAC ATC TCT TAA TAA AAA TTT TCC AAT CTC GCC CCT GTC C 3’ | 685-637 | TR394 |
| OTR 1512 | S | 5’ ATT AAG AGA TGT AGT AAT GTT GCT G 3’ | 664-688 | TR394 |
| AD106 | OTR 1513 | AS | 5’ CCT ACT CCT ACA GCA ACA AAG AAA GAA AGA AAA ATG GCC ATT TTC CAA TCT CGC CC 3’ | 698-643 | TR394 |
| OTR 1514 | S | 5’ TGT TGC TGT AGG AGT AGG GGG 3’ | 681-702 | TR394 |
| AD107 | OTR 1567 | AS | 5’ CCA ACT GCG AAG TTC TCG GCC TCC CTC CCG AGA CCT CAC AGG TAA AAA A 3’ | 360-312 | TR394 |
| OTR 1564 | S | 5’ CCG AGA ACT TCG CAG TTG GC 3’ | 342-361 | TR394 |
| AD108 | OTR 1587 | AS | 5’ CTG TTC GGG CGC CAA CTG CAG GTA AAA AAG ATT ACA CAG ATA CT 3’ | 371-297 | TR394 |
| OTR 1588 | S | 5’ CAG TTG GCG CCC GAA CAG GG 3’ | 354-373 | TR394 |
| AD109 | OTR 1555 | AS | 5’ GAC CTC ACA GGT AAA AAA GAT TAC ATG GGT ACT CGA CAG GGT TC 3’ | 329-286 | TR394 |
| OTR 1556 | S | 5’ TGT AAT CTT TTT TAC CTG TGA GGT C 3’ | 305-329 | TR394 |
| AD110 | OTR 1589 | AS | 5’ ATC TCG CCC CTG TCC ATT CTC TGT GTT GCT GTA GAA TCT CTC CTA C 3’ | 651-606 | TR394 |
| OTR 1590 | S | 5’ GAC AGG GGC GAG ATT GGA A 3’ | 638-656 | TR394 |
| AD111 | OTR 1591 | AS | 5’ CTC ACA GGT AAA AAA GAT TAC ACG GGT ACT CGA CAG GGT TCA ATC TCA AA 3’ | 326-277 | TR394 |
| OTR 1592 | S | 5’ GTG TAA TCT TTT TTA CCT GTG AGG T 3’ | 304-328 | TR394 |
| AD112 | OTR 1674 | AS | 5’ GAC CTC ACA GGT AAA AAA GAT TAC ACA GGT ACT CGA CAG GGT TC 3’ | 329-286 | TR394 |
| OTR 1556 | S | 5’ TGT AAT CTT TTT TAC CTG TGA GGT C 3’ | 305-329 | TR394 |
| AD113 | OTR 1676 | AS | 5’ GAC CTC ACA GGT AAA AAA GAT TAC ATG GAT ACT CGA CAG GGT TC 3’ | 329-286 | TR394 |
| OTR 1556 | S | 5’ TGT AAT CTT TTT TAC CTG TGA GGT C 3’ | 305-329 | TR394 |
| AD114 | OTR 1677 | AS | 5’ GAC CTC ACA GGT AAA AAA GAT TAC ATA GAT ACT CGA CAG GGT TC 3’ | 329-286 | TR394 |
| OTR 1556 | S | 5’ TGT AAT CTT TTT TAC CTG TGA GGT C 3’ | 305-329 | TR394 |
| AD115 | OTR 1678 | AS | 5’ GAC CTC ACA GGT AAA AAA GAT TAC ACA AGT ACT CGA CAG GGT TC 3’ | 329-286 | TR394 |
| OTR 1556 | S | 5’ TGT AAT CTT TTT TAC CTG TGA GGT C 3’ | 305-329 | TR394 |
| AD116 | OTR 1680 | AS | 5’ GAC CTC ACA GGT AAA AAA GAT TAC ACG AAT ACT CGA CAG GGT TC 3’ | 329-286 | TR394 |
| OTR 1556 | S | 5’ TGT AAT CTT TTT TAC CTG TGA GGT C 3’ | 305-329 | TR394 |
| AD27 | OTR 1616 | S | ccc **aag ctt** AAT ACG ACT CAC TAT AGG GGA GTC TCT TTG TTG AGG ACT TT | 217-238 | AD05 based on gene synthesis |
| OTR 1369 | AS | aaa **ccc ggg** CCT TCT GCC ATT CTT ATT GTT GC | 6276-6254 | AD05  based on gene synthesis |
| OTR 249 | | S | 5’ CC GCT AGC CTT CGC GAT GTA CGG GCC AGA 3’ | pcDNA3  204-224 | First round  amplification  products in  the SOE  PCR |
| OTR 684 | | AS | 5' CCC **gga tcc** AGA ATA CAT ATT TTC AGC TGC AGC AGC 3' | 960-934 | First round  amplification  products in  the SOE  PCR |
| OTR 1616 | | S | 5’ ccc **aag ctt** AAT ACG ACT CAC TAT AGG GGA GTC TCT TTG TTG AGG ACT TT 3' | 217-238 | TR394/its mutants to generate *in vitro* transcribing clones |
| OTR 1360 | | AS | 5’ aaa **ccc ggg** AGA ATA CAT ATT TTC AGC TGC AG 3’ | 960-938 |

| **Primers used for SHAPE, PCR, and RT-qPCR.** | | | | |
| --- | --- | --- | --- | --- |
| **Primer** | **Description** | ***S or AS** | **Sequence** | ****Nucleotide position** |
| AS_FIV_1 | Labelled primers used for SHAPE analysis of WT (AD26) | AS | VIC - 5’ CTC CTG GCT TGA AGG TCC GCG 3’ | 581-561 |
| AS_FIV_2 | AS | NED - 5’ CTC CTG GCT TGA AGG TCC GCG 3’ | 581-561 |
| AS_FIV_3 | AS | VIC- 5’ CTG CAG CAG CAG TAG ACA CCG 3’ | 943-923 |
| AS_FIV_4 | AS | NED - 5’ CTG CAG CAG CAG TAG ACA CCG 3’ | 943-923 |
| AS_FIV_5 | AS | VIC – 5’ CAT CTC TTA ATG GCC ATT TTC C 3’ | 673-653 |
| AS_FIV_6 | AS | VIC – 5’ CAT CTC TTA ATG GCCATT TTC C 3’ | 673-653 |
| AS_FIV_1 | Labelled primers used for SHAPE analysis of *env* RNA (AD27) | AS | VIC - 5’ CTC CTG GCT TGA AGG TCC GCG 3’ | 581-561 |
| AS_FIV_2 | AS | NED - 5’ CTC CTG GCT TGA AGG TCC GCG 3’ | 581-561 |
| AS_FIV_7 | AS | VIC- 5’ CTA ATA CAA ATA TTC TGA TAG C 3’ | 6070-6049 |
| AS_FIV_8 | AS | NED - 5’CTA ATA CAA ATA TTC TGA TAG C 3’ | 6070-6049 |
| AS_FIV_9 | AS | VIC 5’- GAT AAT GTA GAT TGC AAC TGC C 3’ | 6212-6191 |
| AS_FIV_10 | AS | NED 5’- GAT AAT GTA GAT TGC AAC TGC C 3’ | 6212-6191 |
| OTR 581 | β-actin spliced or unspliced mRNA | AS | 5' GGC ATG GGG GAG GGC ATA CC 3' | (Tan *et al*., 1995) |
| OTR 582 | β-actin unspliced mRNA | S | 5' CCA GTG GCT TCC CCA GTG 3' |
| OTR 660 | Vector specific | S | 5’ GAG GAC TTT TGA GTT CTC CCT TGA GGC 3’ | 230-256 |
| OTR 662 | Vector specific | AS | 5’ AGC AGG AGT TCT GCT TAA CAG CTT TC 3’ | 440-415 |
| OTR 1648 | qPCR Forward primer | S | 5’ GGA AGC AGT AGC AGA CGC 3’ | 452-469 |
| OTR 1649 | qPCR Reverse Primer | AS | 5’ CCC TAC TCC TAC AGC AAC 3’ | 699-682 |
| *******OTR 1646 | qPCR Forward primer | S | 5’ GCA GAA CTC CTG CTG ACC TAA 3’ | 427-447 |
| *******OTR 1647 | qPCR Reverse Primer | AS | 5’ AAT CTC GCC CCT GTC CAT TC 3’ | 652-633 |

Sequences in upper case and underlined (AAT ACG ACT CAC TAT AGGG) represent T7 Promoter sequences.

Sequences in lower case represent dummy sequences that were introduced into the oligos to facilitate efficient cleaving by restriction enzymes.

Sequences in lower case and bold represent restriction enzyme sites that were introduced into the oligos.

*S, sense; AS, antisense.

**Nucleotide numbers refer to the GenBank accession number M25381.1; FIV-Petaluma strain (clone: 34TF10). (Talbott *et al*., 1989).

***These primers were used for qPCR of the LRI mutant AD117 only as the reverse primer (OTR 1649) overlapped with the region of mutation introduced.

**References**

1. Browning, M. T., Schmidt, R. D., Lew, K. A., & Rizvi, T. A. (2001). Primate and Feline Lentivirus Vector RNA Packaging and Propagation by Heterologous Lentivirus Virions. *Journal of Virology*, *75*(11), 5129–5140. https://doi.org/10.1128/JVI.75.11.5129-5140.2001
2. Tan, W., Felber, B. K., Zolotukhin, A. S., Pavlakis, G. N., & Schwartz, S. (1995). Efficient expression of the human papillomavirus type 16 L1 protein in epithelial cells by using Rev and the Rev-responsive element of human immunodeficiency virus or the cis-acting transactivation element of simian retrovirus type 1. *Journal of Virology*, *69*(9), 5607–5620.
3. Talbott, R. L., Sparger, E. E., Lovelace, K. M., Fitch, W. M., Pedersen, N. C., Luciw, P. A., & Elder, J. H. (1989). Nucleotide sequence and genomic organization of feline immunodeficiency virus. *Proceedings of the National Academy of Sciences*, *86*(15), 5743–5747
