# Supplementary material
Source: HighWire-hosted journal article supplement (doi:10.1101/rna.079840.123)
Supplement: Supplemental_TableS2.docx [file Supplemental_TableS2.docx]

| **Nucleotide number** | **Mean SHAPE Reactivities**  **(from 3 independent experiments)** | | | | | | | | |
| --- | --- | --- | --- | --- | --- | --- | --- | --- | --- |
| **AD26 (WT)** | | | **AD109*i*** | | | **AD111*i*** | | |
| **Sequence** | **Mean** | **SD** | **Sequence** | **Mean** | **SD** | **Sequence** | **Mean** | **SD** |
| 1 | G | -999.00 | 0.00 | G | -999.00 | 0.00 | G | -999.00 | 0.00 |
| 2 | A | -999.00 | 0.00 | A | -999.00 | 0.00 | A | -999.00 | 0.00 |
| 3 | G | -999.00 | 0.00 | G | -999.00 | 0.00 | G | -999.00 | 0.00 |
| 4 | U | -999.00 | 0.00 | U | -999.00 | 0.00 | U | -999.00 | 0.00 |
| 5 | C | -999.00 | 0.00 | C | -999.00 | 0.00 | C | -999.00 | 0.00 |
| 6 | U | -999.00 | 0.00 | U | -999.00 | 0.00 | U | -999.00 | 0.00 |
| 7 | C | -999.00 | 0.00 | C | -999.00 | 0.00 | C | -999.00 | 0.00 |
| 8 | U | -999.00 | 0.00 | U | -999.00 | 0.00 | U | -999.00 | 0.00 |
| 9 | U | -999.00 | 0.00 | U | -999.00 | 0.00 | U | -999.00 | 0.00 |
| 10 | U | -999.00 | 0.00 | U | -999.00 | 0.00 | U | -999.00 | 0.00 |
| 11 | G | -999.00 | 0.00 | G | -999.00 | 0.00 | G | -999.00 | 0.00 |
| 12 | U | -999.00 | 0.00 | U | -999.00 | 0.00 | U | -999.00 | 0.00 |
| 13 | U | -999.00 | 0.00 | U | -999.00 | 0.00 | U | -999.00 | 0.00 |
| 14 | G | -999.00 | 0.00 | G | -999.00 | 0.00 | G | -999.00 | 0.00 |
| 15 | A | -999.00 | 0.00 | A | -999.00 | 0.00 | A | -999.00 | 0.00 |
| 16 | G | -999.00 | 0.00 | G | -999.00 | 0.00 | G | -999.00 | 0.00 |
| 17 | G | -999.00 | 0.00 | G | -999.00 | 0.00 | G | -999.00 | 0.00 |
| 18 | A | -999.00 | 0.00 | A | -999.00 | 0.00 | A | -999.00 | 0.00 |
| 19 | C | -999.00 | 0.00 | C | -999.00 | 0.00 | C | -999.00 | 0.00 |
| 20 | U | -999.00 | 0.00 | U | -999.00 | 0.00 | U | -999.00 | 0.00 |
| 21 | U | -999.00 | 0.00 | U | -999.00 | 0.00 | U | -999.00 | 0.00 |
| 22 | U | -999.00 | 0.00 | U | -999.00 | 0.00 | U | -999.00 | 0.00 |
| 23 | U | -999.00 | 0.00 | U | -999.00 | 0.00 | U | -999.00 | 0.00 |
| 24 | G | -999.00 | 0.00 | G | -999.00 | 0.00 | G | -999.00 | 0.00 |
| 25 | A | -999.00 | 0.00 | A | -999.00 | 0.00 | A | -999.00 | 0.00 |
| 26 | G | -999.00 | 0.00 | G | -999.00 | 0.00 | G | -999.00 | 0.00 |
| 27 | U | -999.00 | 0.00 | U | -999.00 | 0.00 | U | -999.00 | 0.00 |
| 28 | U | -999.00 | 0.00 | U | -999.00 | 0.00 | U | -999.00 | 0.00 |
| 29 | C | -999.00 | 0.00 | C | -999.00 | 0.00 | C | -999.00 | 0.00 |
| 30 | U | -999.00 | 0.00 | U | -999.00 | 0.00 | U | -999.00 | 0.00 |
| 31 | C | 0.00 | 0.01 | C | -999.00 | 0.00 | C | -999.00 | 0.00 |
| 32 | C | 0.06 | 0.10 | C | -999.00 | 0.00 | C | -999.00 | 0.00 |

| **Nucleotide number** | **Mean SHAPE Reactivities**  **(from 3 independent experiments)** | | | | | | | | |
| --- | --- | --- | --- | --- | --- | --- | --- | --- | --- |
| **AD26 (WT)** | | | **AD109*i*** | | | **AD111*i*** | | |
| **Sequence** | **Mean** | **SD** | **Sequence** | **Mean** | **SD** | **Sequence** | **Mean** | **SD** |
| 33 | C | -999.00 | 0.00 | C | -999.00 | 0.00 | C | -999.00 | 0.00 |
| 34 | U | -999.00 | 0.00 | U | -999.00 | 0.00 | U | -999.00 | 0.00 |
| 35 | U | 0.08 | 0.10 | U | -999.00 | 0.00 | U | -999.00 | 0.00 |
| 36 | G | 0.03 | 0.04 | G | -999.00 | 0.00 | G | -999.00 | 0.00 |
| 37 | A | 0.00 | 0.00 | A | -999.00 | 0.00 | A | -999.00 | 0.00 |
| 38 | G | 0.00 | 0.00 | G | -999.00 | 0.00 | G | -999.00 | 0.00 |
| 39 | G | 0.00 | 0.00 | G | -999.00 | 0.00 | G | -999.00 | 0.00 |
| 40 | C | 1.33 | 1.15 | C | -999.00 | 0.00 | C | -999.00 | 0.00 |
| 41 | U | 0.67 | 1.15 | U | -999.00 | 0.00 | U | -999.00 | 0.00 |
| 42 | C | -999.00 | 0.00 | C | -999.00 | 0.00 | C | -999.00 | 0.00 |
| 43 | C | -999.00 | 0.00 | C | -999.00 | 0.00 | C | -999.00 | 0.00 |
| 44 | C | 0.00 | 0.00 | C | -999.00 | 0.00 | C | -999.00 | 0.00 |
| 45 | A | 0.41 | 0.38 | A | -999.00 | 0.00 | A | -999.00 | 0.00 |
| 46 | C | 0.24 | 0.28 | C | -999.00 | 0.00 | C | -999.00 | 0.00 |
| 47 | A | 0.00 | 0.00 | A | -999.00 | 0.00 | A | -999.00 | 0.00 |
| 48 | G | 0.01 | 0.02 | G | -999.00 | 0.00 | G | -999.00 | 0.00 |
| 49 | A | 0.13 | 0.14 | A | -999.00 | 0.00 | A | -999.00 | 0.00 |
| 50 | U | 0.07 | 0.07 | U | -999.00 | 0.00 | U | -999.00 | 0.00 |
| 51 | A | 0.07 | 0.06 | A | -999.00 | 0.00 | A | -999.00 | 0.00 |
| 52 | C | -999.00 | 0.00 | C | -999.00 | 0.00 | C | -999.00 | 0.00 |
| 53 | A | 0.25 | 0.17 | A | -999.00 | 0.00 | A | 0.20 | 0.17 |
| 54 | A | 0.70 | 0.23 | A | -999.00 | 0.00 | A | 0.72 | 0.10 |
| 55 | U | 0.87 | 0.55 | U | 0.87 | 0.68 | U | 0.74 | 0.21 |
| 56 | A | 0.49 | 0.18 | A | 0.25 | 0.26 | A | 0.62 | 0.19 |
| 57 | A | 0.33 | 0.06 | A | 0.22 | 0.07 | A | 0.47 | 0.12 |
| 58 | A | 0.39 | 0.10 | A | 0.18 | 0.06 | A | 0.59 | 0.09 |
| 59 | U | 0.89 | 0.52 | U | 0.80 | 0.57 | U | 0.80 | 0.19 |
| 60 | A | 0.24 | 0.08 | A | 0.31 | 0.34 | A | 0.38 | 0.06 |
| 61 | U | 0.14 | 0.04 | U | 0.21 | 0.24 | U | 0.08 | 0.03 |
| 62 | U | 0.23 | 0.09 | U | 0.23 | 0.19 | U | 0.25 | 0.05 |
| 63 | U | 0.23 | 0.09 | U | 0.14 | 0.14 | U | 0.35 | 0.05 |
| 64 | G | 0.33 | 0.08 | G | 0.10 | 0.06 | G | 0.79 | 0.13 |

| **Nucleotide number** | **Mean SHAPE Reactivities**  **(from 3 independent experiments)** | | | | | | | | |
| --- | --- | --- | --- | --- | --- | --- | --- | --- | --- |
| **AD26 (WT)** | | | **AD109*i*** | | | **AD111*i*** | | |
| **Sequence** | **Mean** | **SD** | **Sequence** | **Mean** | **SD** | **Sequence** | **Mean** | **SD** |
| 65 | A | 0.26 | 0.04 | A | 0.28 | 0.20 | A | 0.73 | 0.10 |
| 66 | G | 0.20 | 0.03 | G | 0.13 | 0.10 | G | 0.46 | 0.06 |
| 67 | A | 0.22 | 0.11 | A | 0.28 | 0.26 | A | 0.15 | 0.05 |
| 68 | U | 0.30 | 0.14 | U | 0.12 | 0.03 | U | 0.36 | 0.08 |
| 69 | U | 0.30 | 0.18 | U | 0.37 | 0.23 | U | 0.80 | 0.10 |
| 70 | G | 0.30 | 0.16 | G | 0.27 | 0.06 | G | 1.05 | 0.09 |
| 71 | A | 0.20 | 0.14 | A | 0.61 | 0.11 | A | 1.83 | 0.14 |
| 72 | A | 0.05 | 0.06 | A | 0.47 | 0.11 | A | 0.91 | 0.14 |
| 73 | C | 0.01 | 0.02 | C | 0.09 | 0.12 | C | 0.04 | 0.02 |
| 74 | C | 0.00 | 0.01 | C | 0.00 | 0.01 | C | 0.00 | 0.00 |
| 75 | C | 0.07 | 0.03 | C | 0.01 | 0.02 | C | 0.30 | 0.31 |
| 76 | U | 0.02 | 0.03 | U | 0.04 | 0.03 | U | 0.13 | 0.12 |
| 77 | G | 0.08 | 0.02 | G | 0.10 | 0.04 | G | 0.29 | 0.09 |
| 78 | U | 0.14 | 0.06 | U | 0.06 | 0.02 | U | 0.01 | 0.01 |
| 79 | C | 0.32 | 0.24 | C | 0.23 | 0.07 | C | 0.24 | 0.13 |
| 80 | G | 1.13 | 0.30 | G | 1.87 | 0.19 | G | 1.80 | 0.16 |
| 81 | A | 1.67 | 0.39 | A | 1.32 | 0.36 | A | 1.29 | 0.15 |
| 82 | G | 0.49 | 0.15 | G | 0.28 | 0.08 | G | 0.29 | 0.03 |
| 83 | U | 0.87 | 0.34 | U | 0.55 | 0.14 | U | 0.40 | 0.05 |
| 84 | A | 0.93 | 0.19 | A | 0.22 | 0.03 | A | 0.17 | 0.06 |
| 85 | U | 0.31 | 0.09 | U **→** C | 0.04 | 0.02 | U **→** C | 0.03 | 0.05 |
| 86 | C | 0.10 | 0.03 | C | 0.02 | 0.03 | C | 0.01 | 0.02 |
| 87 | U | 0.16 | 0.03 | U → C | 0.70 | 0.61 | U → C | 0.52 | 0.11 |
| 88 | G | 0.70 | 0.12 | G → A | 0.72 | 0.18 | G | 2.00 | 0.00 |
| 89 | U | 0.84 | 0.13 | U | 0.67 | 0.12 | U | 0.71 | 0.12 |
| 90 | G | 2.00 | 0.00 | G | 1.64 | 0.27 | G | 1.73 | 0.24 |
| 91 | U | 2.00 | 0.00 | U | 2.00 | 0.00 | U | 1.33 | 0.48 |
| 92 | A | 0.84 | 0.10 | A | 0.75 | 0.10 | A | 0.62 | 0.13 |
| 93 | A | 0.32 | 0.09 | A | 0.26 | 0.04 | A | 0.24 | 0.06 |
| 94 | U | 0.10 | 0.06 | U | 0.12 | 0.01 | U | 0.07 | 0.04 |
| 95 | C | 0.04 | 0.04 | C | 0.19 | 0.10 | C | 0.07 | 0.04 |
| 96 | U | 0.48 | 0.07 | U | 0.52 | 0.18 | U | 0.16 | 0.08 |

| **Nucleotide number** | **Mean SHAPE Reactivities**  **(from 3 independent experiments)** | | | | | | | | |
| --- | --- | --- | --- | --- | --- | --- | --- | --- | --- |
| **AD26 (WT)** | | | **AD109*i*** | | | **AD111*i*** | | |
| **Sequence** | **Mean** | **SD** | **Sequence** | **Mean** | **SD** | **Sequence** | **Mean** | **SD** |
| 97 | U | 0.16 | 0.06 | U | 0.22 | 0.02 | U | 0.17 | 0.03 |
| 98 | U | 0.13 | 0.05 | U | 0.17 | 0.01 | U | 0.14 | 0.03 |
| 99 | U | 0.15 | 0.05 | U | 0.17 | 0.03 | U | 0.15 | 0.03 |
| 100 | U | 0.26 | 0.10 | U | 0.32 | 0.04 | U | 0.14 | 0.03 |
| 101 | U | 0.53 | 0.41 | U | 0.60 | 0.32 | U | 0.10 | 0.02 |
| 102 | A | 0.08 | 0.06 | A | 0.20 | 0.05 | A | 0.05 | 0.02 |
| 103 | C | 0.04 | 0.04 | C | 0.09 | 0.09 | C | 0.00 | 0.01 |
| 104 | C | 0.18 | 0.07 | C | 0.11 | 0.04 | C | 0.00 | 0.00 |
| 105 | U | 0.47 | 0.11 | U | 0.48 | 0.16 | U | 0.12 | 0.12 |
| 106 | G | 0.12 | 0.02 | G | 0.15 | 0.05 | G | 0.08 | 0.03 |
| 107 | U | 0.10 | 0.02 | U | 0.14 | 0.05 | U | 0.07 | 0.03 |
| 108 | G | 0.01 | 0.01 | G | 0.02 | 0.02 | G | 0.00 | 0.00 |
| 109 | A | 0.04 | 0.03 | A | 0.08 | 0.02 | A | 0.03 | 0.02 |
| 110 | G | 0.00 | 0.00 | G | 0.01 | 0.01 | G | 0.01 | 0.02 |
| 111 | G | 0.02 | 0.03 | G | 0.02 | 0.02 | G | 0.00 | 0.01 |
| 112 | U | 0.02 | 0.03 | U | 0.13 | 0.18 | U | 0.05 | 0.03 |
| 113 | C | 0.14 | 0.08 | C | 0.03 | 0.02 | C | 0.05 | 0.01 |
| 114 | U | 0.07 | 0.05 | U | 0.01 | 0.02 | U | 0.01 | 0.01 |
| 115 | C | 0.01 | 0.02 | C | 0.00 | 0.00 | C | 0.00 | 0.00 |
| 116 | G | 0.00 | 0.00 | G | 0.00 | 0.01 | G | 0.00 | 0.00 |
| 117 | G | 0.01 | 0.01 | G | 0.00 | 0.00 | G | 0.02 | 0.05 |
| 118 | A | 1.12 | 0.16 | A | 0.86 | 0.15 | A | 0.87 | 0.16 |
| 119 | A | 2.00 | 0.00 | A | 1.83 | 0.30 | A | 1.49 | 0.13 |
| 120 | U | 0.47 | 0.11 | U | 0.63 | 0.15 | U | 0.44 | 0.08 |
| 121 | C | 0.15 | 0.04 | C | 0.19 | 0.03 | C | 0.14 | 0.03 |
| 122 | C | 0.16 | 0.04 | C | 0.12 | 0.05 | C | 0.17 | 0.03 |
| 123 | G | 0.63 | 0.15 | G | 0.54 | 0.13 | G | 0.67 | 0.06 |
| 124 | G | 0.85 | 0.19 | G | 0.77 | 0.13 | G | 0.63 | 0.05 |
| 125 | G | 0.19 | 0.07 | G | 0.22 | 0.04 | G | 0.04 | 0.05 |
| 126 | C | 0.05 | 0.03 | C | 0.07 | 0.02 | C | 0.00 | 0.00 |
| 127 | C | 0.00 | 0.00 | C | 0.00 | 0.00 | C | 0.00 | 0.00 |
| 128 | G | 0.00 | 0.00 | G | 0.00 | 0.00 | G | 0.00 | 0.00 |

| **Nucleotide number** | **Mean SHAPE Reactivities**  **(from 3 independent experiments)** | | | | | | | | |
| --- | --- | --- | --- | --- | --- | --- | --- | --- | --- |
| **AD26 (WT)** | | | **AD109*i*** | | | **AD111*i*** | | |
| **Sequence** | **Mean** | **SD** | **Sequence** | **Mean** | **SD** | **Sequence** | **Mean** | **SD** |
| 129 | A | 0.02 | 0.02 | A | 0.08 | 0.01 | A | 0.03 | 0.04 |
| 130 | G | 0.07 | 0.07 | G | 0.17 | 0.04 | G | 0.40 | 0.24 |
| 131 | A | 2.00 | 0.00 | A | 2.00 | 0.00 | A | 2.00 | 0.00 |
| 132 | A | 1.87 | 0.21 | A | 1.77 | 0.04 | A | 1.86 | 0.15 |
| 133 | C | 0.21 | 0.03 | C | 0.17 | 0.03 | C | 0.27 | 0.09 |
| 134 | U | 0.05 | 0.02 | U | 0.07 | 0.02 | U | 0.04 | 0.02 |
| 135 | U | 0.03 | 0.03 | U | 0.06 | 0.02 | U | 0.03 | 0.01 |
| 136 | C | 0.00 | 0.00 | C | 0.00 | 0.00 | C | 0.00 | 0.00 |
| 137 | G | 0.03 | 0.03 | G | 0.06 | 0.04 | G | 0.02 | 0.01 |
| 138 | C | 0.32 | 0.34 | C | 0.87 | 0.59 | C | 0.01 | 0.02 |
| 139 | A | 0.72 | 0.04 | A | 0.60 | 0.10 | A | 0.19 | 0.09 |
| 140 | G | 0.13 | 0.14 | G | 0.20 | 0.22 | G | 0.00 | 0.00 |
| 141 | U | 0.11 | 0.06 | U | 0.23 | 0.03 | U | 0.02 | 0.03 |
| 142 | U | 0.04 | 0.04 | U | 0.18 | 0.06 | U | 0.05 | 0.05 |
| 143 | G | 0.00 | 0.00 | G | 0.01 | 0.01 | G | 0.01 | 0.01 |
| 144 | G | 0.01 | 0.02 | G | 0.03 | 0.04 | G | 0.02 | 0.02 |
| 145 | C | 0.14 | 0.10 | C | 0.26 | 0.12 | C | 0.11 | 0.06 |
| 146 | G | 0.04 | 0.06 | G | 0.09 | 0.09 | G | 0.01 | 0.01 |
| 147 | C | 0.15 | 0.17 | C | 0.10 | 0.09 | C | 0.00 | 0.01 |
| 148 | C | 0.35 | 0.04 | C | 0.28 | 0.08 | C | 0.00 | 0.00 |
| 149 | C | 0.30 | 0.15 | C | 0.28 | 0.09 | C | 0.16 | 0.26 |
| 150 | G | 0.31 | 0.08 | G | 0.37 | 0.04 | G | 0.55 | 0.06 |
| 151 | A | 0.06 | 0.01 | A | 0.12 | 0.02 | A | 0.10 | 0.03 |
| 152 | A | 0.02 | 0.03 | A | 0.39 | 0.45 | A | 0.18 | 0.25 |
| 153 | C | -999.00 | 0.00 | C | 1.39 | 1.07 | C | 0.87 | 0.98 |
| 154 | A | 0.03 | 0.03 | A | 0.05 | 0.08 | A | 0.02 | 0.04 |
| 155 | G | 0.02 | 0.03 | G | 0.54 | 0.93 | G | 0.00 | 0.00 |
| 156 | G | 0.02 | 0.04 | G | 0.53 | 0.63 | G | 1.51 | 0.83 |
| 157 | G | 0.04 | 0.06 | G | 0.35 | 0.46 | G | 1.33 | 1.03 |
| 158 | A | 0.05 | 0.09 | A | 0.13 | 0.22 | A | 0.00 | 0.00 |
| 159 | C | 0.03 | 0.04 | C | 0.06 | 0.10 | C | 0.01 | 0.02 |
| 160 | U | 0.00 | 0.00 | U | 0.02 | 0.03 | U | 0.05 | 0.07 |

| **Nucleotide number** | **Mean SHAPE Reactivities**  **(from 3 independent experiments)** | | | | | | | | |
| --- | --- | --- | --- | --- | --- | --- | --- | --- | --- |
| **AD26 (WT)** | | | **AD109*i*** | | | **AD111*i*** | | |
| **Sequence** | **Mean** | **SD** | **Sequence** | **Mean** | **SD** | **Sequence** | **Mean** | **SD** |
| 161 | U | 0.00 | 0.00 | U | 0.01 | 0.02 | U | 0.03 | 0.04 |
| 162 | G | 0.00 | 0.00 | G | 0.01 | 0.02 | G | 0.00 | 0.01 |
| 163 | A | 0.05 | 0.03 | A | 0.06 | 0.02 | A | 0.02 | 0.04 |
| 164 | U | 0.05 | 0.02 | U | 0.04 | 0.01 | U | 0.03 | 0.05 |
| 165 | U | 0.01 | 0.01 | U | 0.04 | 0.02 | U | 0.10 | 0.05 |
| 166 | G | 0.09 | 0.05 | G | 0.13 | 0.07 | G | 0.53 | 0.07 |
| 167 | A | 0.49 | 0.07 | A | 0.29 | 0.08 | A | 0.85 | 0.17 |
| 168 | G | 0.02 | 0.03 | G | 0.00 | 0.00 | G | 0.07 | 0.04 |
| 169 | A | 0.01 | 0.01 | A | 0.23 | 0.35 | A | 0.01 | 0.01 |
| 170 | G | 0.02 | 0.03 | G | 0.15 | 0.21 | G | 0.06 | 0.04 |
| 171 | U | 1.02 | 0.28 | U | 1.00 | 0.05 | U | 1.63 | 0.11 |
| 172 | G | 1.07 | 0.13 | G | 0.65 | 0.20 | G | 1.35 | 0.14 |
| 173 | A | 1.27 | 0.29 | A | 1.05 | 0.31 | A | 1.31 | 0.22 |
| 174 | U | 0.38 | 0.09 | U | 0.26 | 0.11 | U | 0.50 | 0.07 |
| 175 | U | 0.34 | 0.06 | U | 0.16 | 0.13 | U | 0.51 | 0.12 |
| 176 | G | 0.00 | 0.01 | G | 0.04 | 0.07 | G | 0.03 | 0.02 |
| 177 | A | 0.03 | 0.03 | A | 0.00 | 0.01 | A | 0.00 | 0.01 |
| 178 | G | 0.02 | 0.02 | G | 0.06 | 0.08 | G | 0.01 | 0.02 |
| 179 | G | 0.00 | 0.00 | G | 0.02 | 0.04 | G | 0.00 | 0.00 |
| 180 | A | 0.37 | 0.20 | A | 0.20 | 0.06 | A | 0.29 | 0.03 |
| 181 | A | 0.34 | 0.03 | A | 0.22 | 0.06 | A | 0.30 | 0.04 |
| 182 | G | 0.06 | 0.09 | G | 0.06 | 0.05 | G | 0.02 | 0.01 |
| 183 | U | 0.04 | 0.04 | U | 0.03 | 0.04 | U | 0.06 | 0.01 |
| 184 | G | 0.06 | 0.01 | G | 0.29 | 0.43 | G | 0.33 | 0.13 |
| 185 | A | 1.62 | 0.66 | A | 1.13 | 0.38 | A | 1.87 | 0.15 |
| 186 | A | 0.63 | 0.37 | A | 0.44 | 0.34 | A | 0.31 | 0.03 |
| 187 | G | 0.08 | 0.12 | G | 0.06 | 0.07 | G | 0.03 | 0.03 |
| 188 | C | 0.01 | 0.01 | C | 0.02 | 0.02 | C | 0.01 | 0.02 |
| 189 | U | 0.03 | 0.05 | U | 0.13 | 0.03 | U | 0.02 | 0.04 |
| 190 | A | 0.01 | 0.02 | A | 0.00 | 0.00 | A | 0.01 | 0.02 |
| 191 | G | 0.00 | 0.00 | G | 0.00 | 0.00 | G | 0.00 | 0.00 |
| 192 | A | 0.00 | 0.00 | A | 0.00 | 0.00 | A | 0.00 | 0.00 |

| **Nucleotide number** | **Mean SHAPE Reactivities**  **(from 3 independent experiments)** | | | | | | | | |
| --- | --- | --- | --- | --- | --- | --- | --- | --- | --- |
| **AD26 (WT)** | | | **AD109*i*** | | | **AD111*i*** | | |
| **Sequence** | **Mean** | **SD** | **Sequence** | **Mean** | **SD** | **Sequence** | **Mean** | **SD** |
| 193 | G | 0.08 | 0.03 | G | 0.08 | 0.02 | G | 0.09 | 0.07 |
| 194 | C | 1.56 | 0.37 | C | 1.52 | 0.39 | C | 1.47 | 0.18 |
| 195 | A | 2.00 | 0.00 | A | 2.00 | 0.00 | A | 2.00 | 0.00 |
| 196 | A | 1.99 | 0.02 | A | 2.00 | 0.00 | A | 1.87 | 0.11 |
| 197 | U | 1.98 | 0.04 | U | 1.85 | 0.05 | U | 1.63 | 0.15 |
| 198 | A | 0.53 | 0.05 | A | 0.39 | 0.08 | A | 0.38 | 0.08 |
| 199 | G | 0.15 | 0.05 | G | 0.04 | 0.05 | G | 0.03 | 0.04 |
| 200 | A | 0.54 | 0.07 | A | 0.47 | 0.02 | A | 0.39 | 0.03 |
| 201 | A | 0.12 | 0.02 | A | 0.10 | 0.02 | A | 0.08 | 0.03 |
| 202 | A | 0.55 | 0.11 | A | 0.56 | 0.04 | A | 0.48 | 0.07 |
| 203 | G | 0.01 | 0.01 | G | 0.03 | 0.04 | G | 0.01 | 0.02 |
| 204 | C | 0.03 | 0.04 | C | 0.04 | 0.02 | C | 0.00 | 0.00 |
| 205 | U | 0.00 | 0.00 | U | 0.00 | 0.00 | U | 0.00 | 0.00 |
| 206 | G | 0.00 | 0.00 | G | 0.00 | 0.00 | G | 0.00 | 0.00 |
| 207 | U | 0.02 | 0.04 | U | 0.01 | 0.01 | U | 0.01 | 0.01 |
| 208 | U | 0.47 | 0.14 | U | 0.38 | 0.06 | U | 0.30 | 0.08 |
| 209 | A | 2.00 | 0.00 | A | 2.00 | 0.00 | A | 2.00 | 0.00 |
| 210 | A | 2.00 | 0.00 | A | 2.00 | 0.00 | A | 2.00 | 0.00 |
| 211 | G | 0.22 | 0.01 | G | 0.18 | 0.06 | G | 0.15 | 0.06 |
| 212 | C | 0.03 | 0.05 | C | 0.04 | 0.03 | C | 0.00 | 0.00 |
| 213 | A | 0.07 | 0.11 | A | 0.07 | 0.04 | A | 0.00 | 0.00 |
| 214 | G | 0.00 | 0.00 | G | 0.00 | 0.00 | G | 0.00 | 0.00 |
| 215 | A | 0.32 | 0.04 | A | 0.23 | 0.04 | A | 0.28 | 0.04 |
| 216 | A | 0.17 | 0.13 | A | 0.24 | 0.02 | A | 0.37 | 0.05 |
| 217 | C | 0.02 | 0.02 | C | 0.02 | 0.02 | C | 0.02 | 0.01 |
| 218 | U | 0.02 | 0.02 | U | 0.03 | 0.02 | U | 0.02 | 0.01 |
| 219 | C | 0.01 | 0.01 | C | 0.02 | 0.03 | C | 0.00 | 0.00 |
| 220 | C | 0.00 | 0.00 | C | 0.01 | 0.02 | C | 0.01 | 0.01 |
| 221 | U | 0.00 | 0.00 | U | 0.02 | 0.03 | U | 0.00 | 0.00 |
| 222 | G | 0.00 | 0.00 | G | 0.00 | 0.00 | G | 0.00 | 0.00 |
| 223 | C | 0.06 | 0.04 | C | 0.07 | 0.01 | C | 0.01 | 0.01 |
| 224 | U | 0.27 | 0.07 | U | 0.18 | 0.02 | U | 0.12 | 0.02 |

| **Nucleotide number** | **Mean SHAPE Reactivities**  **(from 3 independent experiments)** | | | | | | | | |
| --- | --- | --- | --- | --- | --- | --- | --- | --- | --- |
| **AD26 (WT)** | | | **AD109*i*** | | | **AD111*i*** | | |
| **Sequence** | **Mean** | **SD** | **Sequence** | **Mean** | **SD** | **Sequence** | **Mean** | **SD** |
| 225 | G | 0.11 | 0.09 | G | 0.12 | 0.03 | G | 0.28 | 0.09 |
| 226 | A | 1.30 | 0.18 | A | 1.31 | 0.04 | A | 0.63 | 0.11 |
| 227 | C | 0.12 | 0.02 | C | 0.15 | 0.01 | C | 0.04 | 0.01 |
| 228 | C | 1.30 | 0.46 | C | 1.04 | 0.15 | C | 0.10 | 0.03 |
| 229 | U | 1.98 | 0.04 | U | 1.95 | 0.08 | U | 0.75 | 0.13 |
| 230 | A | 2.00 | 0.00 | A | 2.00 | 0.00 | A | 2.00 | 0.00 |
| 231 | A | 1.25 | 0.29 | A | 1.06 | 0.14 | A | 1.96 | 0.11 |
| 232 | A | 2.00 | 0.00 | A | 2.00 | 0.00 | A | 2.00 | 0.00 |
| 233 | U | 2.00 | 0.00 | U | 2.00 | 0.00 | U | 2.00 | 0.00 |
| 234 | A | 0.87 | 0.14 | A | 0.67 | 0.08 | A | 0.70 | 0.10 |
| 235 | G | 0.10 | 0.08 | G | 0.03 | 0.05 | G | 0.03 | 0.03 |
| 236 | G | 0.03 | 0.03 | G | 0.02 | 0.03 | G | 0.00 | 0.00 |
| 237 | G | 0.00 | 0.00 | G | 0.00 | 0.00 | G | 0.00 | 0.00 |
| 238 | A | 0.29 | 0.05 | A | 0.25 | 0.02 | A | 0.19 | 0.04 |
| 239 | A | 0.12 | 0.05 | A | 0.10 | 0.02 | A | 0.09 | 0.04 |
| 240 | G | 0.01 | 0.01 | G | 0.01 | 0.01 | G | 0.04 | 0.03 |
| 241 | C | 0.02 | 0.04 | C | 0.00 | 0.00 | C | 0.00 | 0.00 |
| 242 | A | 0.08 | 0.08 | A | 0.03 | 0.03 | A | 0.00 | 0.00 |
| 243 | G | 0.21 | 0.07 | G | 0.23 | 0.08 | G | 0.15 | 0.07 |
| 244 | U | 2.00 | 0.00 | U | 1.84 | 0.14 | U | 1.44 | 0.35 |
| 245 | A | 1.67 | 0.57 | A | 1.40 | 0.46 | A | 1.70 | 0.11 |
| 246 | G | 0.36 | 0.40 | G | 0.98 | 0.37 | G | 0.29 | 0.20 |
| 247 | C | 1.02 | 0.04 | C | 1.07 | 0.09 | C | 0.75 | 0.13 |
| 248 | A | 1.78 | 0.19 | A | 1.66 | 0.15 | A | 1.12 | 0.20 |
| 249 | G | 0.34 | 0.09 | G | 0.51 | 0.15 | G | 0.48 | 0.16 |
| 250 | A | 0.83 | 0.17 | A | 0.79 | 0.13 | A | 0.80 | 0.15 |
| 251 | C | 0.90 | 0.18 | C | 1.02 | 0.14 | C | 0.93 | 0.19 |
| 252 | G | 0.33 | 0.07 | G | 0.46 | 0.06 | G | 0.30 | 0.08 |
| 253 | C | 0.02 | 0.02 | C | 0.02 | 0.02 | C | 0.00 | 0.00 |
| 254 | U | 0.00 | 0.00 | U | 0.00 | 0.00 | U | 0.00 | 0.01 |
| 255 | G | 0.01 | 0.01 | G | 0.01 | 0.02 | G | 0.03 | 0.03 |
| 256 | C | 0.01 | 0.01 | C | 0.01 | 0.01 | C | 0.02 | 0.04 |

| **Nucleotide number** | **Mean SHAPE Reactivities**  **(from 3 independent experiments)** | | | | | | | | |
| --- | --- | --- | --- | --- | --- | --- | --- | --- | --- |
| **AD26 (WT)** | | | **AD109*i*** | | | **AD111*i*** | | |
| **Sequence** | **Mean** | **SD** | **Sequence** | **Mean** | **SD** | **Sequence** | **Mean** | **SD** |
| 257 | U | 0.01 | 0.01 | U | 0.03 | 0.02 | U | 0.02 | 0.04 |
| 258 | A | 0.02 | 0.03 | A | 0.02 | 0.03 | A | 0.03 | 0.04 |
| 259 | A | 0.01 | 0.02 | A | 0.03 | 0.03 | A | 0.02 | 0.02 |
| 260 | C | 0.01 | 0.02 | C | 0.00 | 0.00 | C | 0.00 | 0.00 |
| 261 | A | 0.07 | 0.06 | A | 0.04 | 0.04 | A | 0.00 | 0.00 |
| 262 | G | 0.01 | 0.01 | G | 0.01 | 0.01 | G | 0.01 | 0.03 |
| 263 | U | 0.10 | 0.03 | U | 0.10 | 0.04 | U | 0.11 | 0.04 |
| 264 | G | 0.02 | 0.02 | G | 0.00 | 0.00 | G | 0.02 | 0.02 |
| 265 | A | 0.15 | 0.02 | A | 0.14 | 0.04 | A | 0.15 | 0.05 |
| 266 | G | 0.55 | 0.07 | G | 0.50 | 0.06 | G | 0.41 | 0.09 |
| 267 | U | 0.15 | 0.13 | U | 0.21 | 0.04 | U | 0.05 | 0.03 |
| 268 | A | 0.13 | 0.03 | A | 0.14 | 0.03 | A | 0.12 | 0.02 |
| 269 | U | 0.06 | 0.04 | U | 0.10 | 0.04 | U | 0.10 | 0.01 |
| 270 | C | 0.02 | 0.02 | C | 0.01 | 0.02 | C | 0.00 | 0.00 |
| 271 | U | 0.21 | 0.08 | U | 0.20 | 0.05 | U | 0.00 | 0.01 |
| 272 | C | 0.02 | 0.03 | C | 0.00 | 0.00 | C | 0.00 | 0.01 |
| 273 | U | 0.04 | 0.06 | U | 0.04 | 0.02 | U | 0.00 | 0.00 |
| 274 | A | 0.00 | 0.00 | A | 0.00 | 0.00 | A | 0.01 | 0.02 |
| 275 | G | 0.00 | 0.00 | G | 0.02 | 0.03 | G | 0.05 | 0.11 |
| 276 | U | 0.32 | 0.02 | U | 0.31 | 0.06 | U | 0.27 | 0.13 |
| 277 | G | 0.12 | 0.03 | G | 0.07 | 0.02 | G | 0.09 | 0.09 |
| 278 | A | 1.69 | 0.43 | A | 1.25 | 0.07 | A | 1.94 | 0.08 |
| 279 | A | 0.13 | 0.08 | A | 0.16 | 0.00 | A | 0.27 | 0.05 |
| 280 | G | 0.02 | 0.03 | G | 0.03 | 0.01 | G | 0.04 | 0.03 |
| 281 | C | 0.00 | 0.00 | C | 0.00 | 0.00 | C | 0.01 | 0.02 |
| 282 | G | 0.05 | 0.02 | G | 0.03 | 0.01 | G | 0.05 | 0.07 |
| 283 | G | 0.67 | 0.24 | G | 0.55 | 0.01 | G | 0.72 | 0.11 |
| 284 | A | 0.30 | 0.09 | A | 0.31 | 0.04 | A | 0.35 | 0.06 |
| 285 | C | 0.02 | 0.02 | C | 0.02 | 0.02 | C | 0.03 | 0.05 |
| 286 | U | 0.00 | 0.00 | U | 0.01 | 0.01 | U | 0.02 | 0.04 |
| 287 | C | 0.04 | 0.06 | C | 0.00 | 0.00 | C | 0.01 | 0.03 |
| 288 | G | 0.10 | 0.09 | G | 0.05 | 0.04 | G | 0.05 | 0.06 |

| **Nucleotide number** | **Mean SHAPE Reactivities**  **(from 3 independent experiments)** | | | | | | | | |
| --- | --- | --- | --- | --- | --- | --- | --- | --- | --- |
| **AD26 (WT)** | | | **AD109*i*** | | | **AD111*i*** | | |
| **Sequence** | **Mean** | **SD** | **Sequence** | **Mean** | **SD** | **Sequence** | **Mean** | **SD** |
| 289 | A | 0.30 | 0.10 | A | 0.29 | 0.08 | A | 0.36 | 0.03 |
| 290 | G | 0.02 | 0.03 | G | 0.02 | 0.02 | G | 0.02 | 0.01 |
| 291 | C | 0.16 | 0.15 | C | 0.26 | 0.06 | C | 0.01 | 0.02 |
| 292 | U | 0.03 | 0.03 | U | 0.35 | 0.45 | U | 0.01 | 0.01 |
| 293 | C | 0.00 | 0.00 | C | 0.08 | 0.09 | C | 0.03 | 0.04 |
| 294 | A | 0.65 | 0.14 | A | 0.65 | 0.03 | A | 0.69 | 0.11 |
| 295 | U | 0.81 | 0.15 | U | 0.84 | 0.06 | U | 0.93 | 0.13 |
| 296 | A | 0.15 | 0.03 | A | 0.13 | 0.02 | A | 0.12 | 0.06 |
| 297 | A | 0.05 | 0.03 | A | 0.06 | 0.02 | A | 0.05 | 0.04 |
| 298 | U | 0.01 | 0.01 | U | 0.02 | 0.02 | U | 0.01 | 0.01 |
| 299 | C | 0.02 | 0.04 | C | 0.22 | 0.25 | C | 0.01 | 0.02 |
| 300 | A | 0.02 | 0.03 | A | 0.34 | 0.41 | A | 0.03 | 0.05 |
| 301 | A | 0.02 | 0.03 | A | 0.18 | 0.15 | A | 0.50 | 0.78 |
| 302 | G | 0.15 | 0.25 | G | 0.22 | 0.39 | G | 1.63 | 0.80 |
| 303 | U | 0.11 | 0.20 | U | 0.19 | 0.20 | U | 0.74 | 0.90 |
| 304 | C | 0.10 | 0.17 | C | 0.18 | 0.17 | C | 0.04 | 0.08 |
| 305 | A | 1.03 | 0.42 | A | 1.08 | 0.14 | A | 0.47 | 0.16 |
| 306 | U | 0.44 | 0.25 | U | 0.37 | 0.06 | U | 0.26 | 0.11 |
| 307 | U | 0.03 | 0.04 | U | 0.46 | 0.69 | U | 0.04 | 0.07 |
| 308 | G | 0.07 | 0.06 | G | 0.15 | 0.15 | G | 0.05 | 0.05 |
| 309 | U | -999.00 | 0.00 | U | 0.62 | 0.28 | U | 0.10 | 0.11 |
| 310 | U | 0.46 | 0.30 | U | 0.64 | 0.42 | U | 0.59 | 0.32 |
| 311 | U | 0.56 | 0.50 | U | 0.50 | 0.43 | U | 1.54 | 0.29 |
| 312 | A | 1.26 | 0.32 | A | 1.32 | 0.19 | A | 1.97 | 0.05 |
| 313 | A | 0.95 | 0.17 | A | 1.10 | 0.24 | A | 1.83 | 0.26 |
| 314 | A | 1.01 | 0.18 | A | 1.04 | 0.16 | A | 1.55 | 0.27 |
| 315 | G | 0.06 | 0.03 | G | 0.12 | 0.02 | G | 0.18 | 0.07 |
| 316 | G | 0.03 | 0.03 | G | 0.09 | 0.05 | G | 0.06 | 0.05 |
| 317 | C | 0.00 | 0.00 | C | 0.04 | 0.02 | C | 0.01 | 0.01 |
| 318 | C | 0.05 | 0.09 | C | 0.08 | 0.07 | C | 0.01 | 0.01 |
| 319 | C | 0.01 | 0.02 | C | 0.04 | 0.06 | C | 0.00 | 0.00 |
| 320 | A | -999.00 | 0.00 | A | 0.29 | 0.13 | A | 0.01 | 0.02 |

| **Nucleotide number** | **Mean SHAPE Reactivities**  **(from 3 independent experiments)** | | | | | | | | |
| --- | --- | --- | --- | --- | --- | --- | --- | --- | --- |
| **AD26 (WT)** | | | **AD109*i*** | | | **AD111*i*** | | |
| **Sequence** | **Mean** | **SD** | **Sequence** | **Mean** | **SD** | **Sequence** | **Mean** | **SD** |
| 321 | G | 0.01 | 0.01 | G | 0.00 | 0.00 | G | 0.00 | 0.00 |
| 322 | A | 1.08 | 0.61 | A | 1.54 | 0.18 | A | 0.21 | 0.16 |
| 323 | U | 0.78 | 0.23 | U | 1.12 | 0.49 | U | 0.46 | 0.23 |
| 324 | A | 1.35 | 0.38 | A | 1.38 | 0.55 | A | 1.76 | 0.23 |
| 325 | A | 2.00 | 0.00 | A | 1.91 | 0.15 | A | 2.00 | 0.00 |
| 326 | A | 2.00 | 0.00 | A | 2.00 | 0.00 | A | 2.00 | 0.00 |
| 327 | U | 2.00 | 0.00 | U | 2.00 | 0.00 | U | 1.97 | 0.08 |
| 328 | U | 1.92 | 0.14 | U | 1.95 | 0.08 | U | 1.97 | 0.07 |
| 329 | A | 2.00 | 0.00 | A | 2.00 | 0.00 | A | 1.94 | 0.10 |
| 330 | C | 1.60 | 0.45 | C | 1.16 | 0.89 | C | 0.66 | 0.61 |
| 331 | A | 0.34 | 0.38 | A | 0.18 | 0.15 | A | 0.07 | 0.09 |
| 332 | U | 0.07 | 0.10 | U | 0.00 | 0.00 | U | 0.04 | 0.02 |
| 333 | C | 0.00 | 0.01 | C | 0.07 | 0.01 | C | 0.09 | 0.07 |
| 334 | U | 0.00 | 0.00 | U | 0.05 | 0.03 | U | 0.09 | 0.09 |
| 335 | G | 0.00 | 0.00 | G | 0.01 | 0.02 | G | 0.02 | 0.05 |
| 336 | G | 0.00 | 0.01 | G | 0.00 | 0.00 | G | 0.00 | 0.00 |
| 337 | U | 0.02 | 0.04 | U | 0.09 | 0.05 | U | 0.05 | 0.11 |
| 338 | G | 0.16 | 0.08 | G | 0.11 | 0.02 | G | 0.20 | 0.16 |
| 339 | A | 0.50 | 0.13 | A | 0.45 | 0.17 | A | 0.54 | 0.10 |
| 340 | C | 0.10 | 0.06 | C | 0.03 | 0.04 | C | 0.07 | 0.04 |
| 341 | U | 0.15 | 0.02 | U | 0.05 | 0.02 | U | 0.11 | 0.04 |
| 342 | C | 0.18 | 0.04 | C | 0.04 | 0.06 | C | 0.03 | 0.06 |
| 343 | U | 0.15 | 0.15 | U | 0.24 | 0.21 | U | 0.01 | 0.02 |
| 344 | U | 0.16 | 0.02 | U | 0.11 | 0.10 | U | 0.19 | 0.05 |
| 345 | C | 0.04 | 0.03 | C | 0.01 | 0.01 | C | 0.01 | 0.01 |
| 346 | G | 0.03 | 0.01 | G | 0.04 | 0.04 | G | 0.06 | 0.02 |
| 347 | C | 0.02 | 0.03 | C | 0.02 | 0.02 | C | 0.04 | 0.03 |
| 348 | G | 0.01 | 0.01 | G | 0.02 | 0.03 | G | 0.01 | 0.01 |
| 349 | G | 0.08 | 0.04 | G | 0.09 | 0.03 | G | 0.09 | 0.08 |
| 350 | A | 0.13 | 0.11 | A | 0.21 | 0.08 | A | 0.12 | 0.09 |
| 351 | C | 0.07 | 0.01 | C | 0.03 | 0.02 | C | 0.02 | 0.03 |
| 352 | C | 0.06 | 0.04 | C | 0.03 | 0.03 | C | 0.04 | 0.04 |

| **Nucleotide number** | **Mean SHAPE Reactivities**  **(from 3 independent experiments)** | | | | | | | | |
| --- | --- | --- | --- | --- | --- | --- | --- | --- | --- |
| **AD26 (WT)** | | | **AD109*i*** | | | **AD111*i*** | | |
| **Sequence** | **Mean** | **SD** | **Sequence** | **Mean** | **SD** | **Sequence** | **Mean** | **SD** |
| 353 | U | 0.15 | 0.08 | U | 0.18 | 0.07 | U | 0.04 | 0.04 |
| 354 | U | 0.06 | 0.03 | U | 0.14 | 0.13 | U | 0.10 | 0.04 |
| 355 | C | 0.33 | 0.03 | C | 0.33 | 0.50 | C | 0.29 | 0.11 |
| 356 | A | 1.75 | 0.35 | A | 1.73 | 0.47 | A | 1.76 | 0.20 |
| 357 | A | 1.83 | 0.20 | A | 1.98 | 0.04 | A | 2.00 | 0.00 |
| 358 | G | 0.92 | 0.05 | G | 0.99 | 0.20 | G | 1.46 | 0.25 |
| 359 | C | 0.39 | 0.28 | C | 0.74 | 0.37 | C | 0.49 | 0.20 |
| 360 | C | 0.98 | 0.38 | C | 0.81 | 0.64 | C | 0.57 | 0.48 |
| 361 | A | 1.25 | 0.09 | A | 1.23 | 0.40 | A | 1.72 | 0.23 |
| 362 | G | 0.21 | 0.13 | G | 0.08 | 0.07 | G | 0.06 | 0.07 |
| 363 | G | 0.05 | 0.07 | G | 0.00 | 0.00 | G | 0.02 | 0.04 |
| 364 | A | 0.00 | 0.00 | A | 0.01 | 0.01 | A | 0.00 | 0.01 |
| 365 | G | 0.10 | 0.16 | G | 0.05 | 0.05 | G | 0.03 | 0.06 |
| 366 | A | 0.41 | 0.14 | A | 0.44 | 0.15 | A | 0.42 | 0.13 |
| 367 | U | 0.03 | 0.04 | U | 0.07 | 0.03 | U | 0.02 | 0.02 |
| 368 | U | 0.02 | 0.01 | U | 0.04 | 0.07 | U | 0.03 | 0.02 |
| 369 | C | 0.00 | 0.00 | C | 0.00 | 0.00 | C | 0.01 | 0.01 |
| 370 | G | 0.03 | 0.02 | G | 0.01 | 0.01 | G | 0.02 | 0.02 |
| 371 | C | 0.12 | 0.06 | C | 0.11 | 0.08 | C | 0.03 | 0.03 |
| 372 | C | 0.19 | 0.09 | C | 0.27 | 0.06 | C | 0.19 | 0.06 |
| 373 | G | 0.02 | 0.02 | G | 0.12 | 0.07 | G | 0.08 | 0.10 |
| 374 | A | 0.04 | 0.03 | A | 0.14 | 0.12 | A | 0.07 | 0.12 |
| 375 | G | 0.00 | 0.01 | G | 0.11 | 0.05 | G | 0.13 | 0.07 |
| 376 | G | 0.03 | 0.01 | G | 0.11 | 0.09 | G | 0.14 | 0.08 |
| 377 | G | 0.07 | 0.03 | G | 0.02 | 0.03 | G | 0.00 | 0.00 |
| 378 | A | 0.30 | 0.06 | A | 0.39 | 0.17 | A | 0.30 | 0.06 |
| 379 | C | 0.83 | 0.96 | C | 0.46 | 0.79 | C | 0.12 | 0.17 |
| 380 | A | 0.26 | 0.05 | A | 0.25 | 0.09 | A | 0.33 | 0.07 |
| 381 | G | 0.00 | 0.00 | G | 0.05 | 0.03 | G | 0.03 | 0.04 |
| 382 | U | 0.02 | 0.02 | U | 0.02 | 0.02 | U | 0.02 | 0.03 |
| 383 | C | 0.24 | 0.26 | C | 0.11 | 0.20 | C | 0.03 | 0.07 |
| 384 | A | 0.00 | 0.00 | A | 0.03 | 0.05 | A | 0.00 | 0.00 |

| **Nucleotide number** | **Mean SHAPE Reactivities**  **(from 3 independent experiments)** | | | | | | | | |
| --- | --- | --- | --- | --- | --- | --- | --- | --- | --- |
| **AD26 (WT)** | | | **AD109*i*** | | | **AD111*i*** | | |
| **Sequence** | **Mean** | **SD** | **Sequence** | **Mean** | **SD** | **Sequence** | **Mean** | **SD** |
| 385 | A | 0.08 | 0.10 | A | 0.07 | 0.13 | A | 0.10 | 0.09 |
| 386 | C | 0.54 | 0.69 | C | 0.27 | 0.46 | C | 0.17 | 0.39 |
| 387 | A | 0.14 | 0.13 | A | 0.21 | 0.19 | A | 0.22 | 0.13 |
| 388 | A | 0.22 | 0.10 | A | 0.47 | 0.24 | A | 0.62 | 0.12 |
| 389 | G | 0.02 | 0.04 | G | 0.07 | 0.06 | G | 0.08 | 0.01 |
| 390 | G | 0.02 | 0.02 | G | 0.07 | 0.11 | G | 0.00 | 0.01 |
| 391 | U | 0.13 | 0.21 | U | 0.00 | 0.01 | U | 0.04 | 0.05 |
| 392 | A | 0.03 | 0.03 | A | 0.08 | 0.09 | A | 0.09 | 0.08 |
| 393 | G | 0.02 | 0.01 | G | 0.08 | 0.07 | G | 0.04 | 0.04 |
| 394 | G | 0.00 | 0.00 | G | 0.01 | 0.02 | G | 0.02 | 0.05 |
| 395 | A | 0.01 | 0.02 | A | 0.02 | 0.03 | A | 0.06 | 0.13 |
| 396 | G | 0.01 | 0.02 | G | 0.02 | 0.04 | G | 0.13 | 0.22 |
| 397 | A | 0.01 | 0.01 | A | 0.05 | 0.04 | A | 0.00 | 0.00 |
| 398 | G | 0.00 | 0.00 | G | 0.04 | 0.07 | G | 0.13 | 0.19 |
| 399 | A | 0.10 | 0.08 | A | 0.22 | 0.04 | A | 0.46 | 0.57 |
| 400 | U | 0.36 | 0.09 | U | 0.22 | 0.21 | U | 0.26 | 0.31 |
| 401 | U | 0.97 | 0.32 | U | 0.83 | 0.38 | U | 0.17 | 0.23 |
| 402 | C | 0.13 | 0.04 | C | 0.13 | 0.10 | C | 0.08 | 0.07 |
| 403 | U | 0.00 | 0.00 | U | 0.15 | 0.14 | U | 0.02 | 0.03 |
| 404 | A | 0.00 | 0.00 | A | 0.24 | 0.07 | A | 0.12 | 0.10 |
| 405 | C | 0.00 | 0.01 | C | 0.00 | 0.32 | C | 0.00 | 0.00 |
| 406 | A | 0.02 | 0.02 | A | 0.17 | 0.15 | A | 0.13 | 0.13 |
| 407 | G | 0.00 | 0.00 | G | 0.23 | 0.27 | G | 0.06 | 0.07 |
| 408 | C | 0.15 | 0.25 | C | -999.00 | 0.00 | C | 0.05 | 0.11 |
| 409 | A | 0.08 | 0.14 | A | 0.07 | 0.13 | A | 0.02 | 0.02 |
| 410 | A | 0.07 | 0.03 | A | 0.00 | 0.00 | A | 0.06 | 0.31 |
| 411 | C | -999.00 | 0.00 | C | 0.00 | 0.00 | C | 0.00 | 0.00 |
| 412 | A | 0.05 | 0.08 | A | 0.00 | 0.00 | A | 0.12 | 0.16 |
| 413 | U | 0.02 | 0.03 | U | 0.00 | 0.01 | U | 0.17 | 0.05 |
| 414 | G | 0.09 | 0.02 | G | 0.04 | 0.08 | G | 0.31 | 0.48 |
| 415 | G | 0.38 | 0.10 | G | 0.15 | 0.27 | G | 0.31 | 0.69 |
| 416 | G | 0.45 | 0.25 | G | -999.00 | 0.00 | G | 0.00 | 0.00 |

| **Nucleotide number** | **Mean SHAPE Reactivities**  **(from 3 independent experiments)** | | | | | | | | |
| --- | --- | --- | --- | --- | --- | --- | --- | --- | --- |
| **AD26 (WT)** | | | **AD109*i*** | | | **AD111*i*** | | |
| **Sequence** | **Mean** | **SD** | **Sequence** | **Mean** | **SD** | **Sequence** | **Mean** | **SD** |
| 417 | G | 1.21 | 0.16 | G | -999.00 | 0.00 | G | 0.21 | 0.27 |
| 418 | A | 0.67 | 0.08 | A | 0.61 | 0.15 | A | 0.33 | 0.20 |
| 419 | A | 0.45 | 0.18 | A | 0.33 | 0.11 | A | 0.28 | 0.20 |
| 420 | U | 0.64 | 0.35 | U | 0.54 | 0.14 | U | 0.49 | 0.17 |
| 421 | G | 0.45 | 0.13 | G | 0.95 | 0.15 | G | 0.51 | 0.27 |
| 422 | G | 0.06 | 0.09 | G | 0.09 | 0.02 | G | 0.10 | 0.11 |
| 423 | A | 0.43 | 0.29 | A | 0.06 | 0.10 | A | 0.15 | 0.10 |
| 424 | C | 1.08 | 0.94 | C | -999.00 | 0.00 | C | 0.02 | 0.03 |
| 425 | A | 0.04 | 0.06 | A | 0.00 | 0.00 | A | 0.01 | 0.02 |
| 426 | G | 0.00 | 0.00 | G | -999.00 | 0.00 | G | 0.00 | 0.00 |
| 427 | G | 0.00 | 0.00 | G | -999.00 | 0.00 | G | 0.00 | 0.00 |
| 428 | G | 0.00 | 0.00 | G | 0.07 | 1.11 | G | 0.00 | 0.00 |
| 429 | G | 0.04 | 0.07 | G | 0.83 | 0.75 | G | 0.00 | 0.00 |
| 430 | C | 0.41 | 0.27 | C | 0.53 | 0.41 | C | 0.01 | 0.03 |
| 431 | G | 0.19 | 0.33 | G | 0.24 | 0.20 | G | 0.27 | 0.16 |
| 432 | A | 0.41 | 0.22 | A | 0.30 | 0.16 | A | 0.60 | 0.29 |
| 433 | G | 0.17 | 0.08 | G | 0.07 | 0.05 | G | 0.42 | 0.15 |
| 434 | A | 0.06 | 0.08 | A | 0.08 | 0.05 | A | 0.31 | 0.09 |
| 435 | U | 0.18 | 0.15 | U | 0.32 | 0.14 | U | 0.24 | 0.29 |
| 436 | U | 0.22 | 0.07 | U | 0.18 | 0.06 | U | 0.62 | 0.08 |
| 437 | G | 0.29 | 0.03 | G | 0.20 | 0.04 | G | 0.57 | 0.14 |
| 438 | G | 0.33 | 0.07 | G | 0.18 | 0.09 | G | 0.54 | 0.10 |
| 439 | A | 0.30 | 0.07 | A | 0.20 | 0.06 | A | 0.59 | 0.08 |
| 440 | A | 0.30 | 0.03 | A | 0.28 | 0.07 | A | 0.47 | 0.18 |
| 441 | A | 0.13 | 0.02 | A | 0.08 | 0.01 | A | 0.14 | 0.07 |
| 442 | A | 0.04 | 0.03 | A | 0.06 | 0.06 | A | 0.09 | 0.11 |
| 443 | U | 0.05 | 0.05 | U | 0.00 | 0.00 | U | 0.17 | 0.13 |
| 444 | G | 0.06 | 0.05 | G | 0.00 | 0.00 | G | 0.07 | 0.08 |
| 445 | G | 0.00 | 0.00 | G | 0.00 | 0.00 | G | 0.00 | 0.00 |
| 446 | C | 0.23 | 0.40 | C | 0.00 | 0.00 | C | 0.00 | 0.00 |
| 447 | C | -999.00 | 0.00 | C | 0.00 | 0.00 | C | 0.03 | 0.08 |
| 448 | A | 0.20 | 0.33 | A | 0.36 | 0.21 | A | 0.00 | 0.00 |

| **Nucleotide number** | **Mean SHAPE Reactivities**  **(from 3 independent experiments)** | | | | | | | | |
| --- | --- | --- | --- | --- | --- | --- | --- | --- | --- |
| **AD26 (WT)** | | | **AD109*i*** | | | **AD111i** | | |
| **Sequence** | **Mean** | **SD** | **Sequence** | **Mean** | **SD** | **Sequence** | **Mean** | **SD** |
| 449 | U | 0.45 | 0.02 | U | 0.24 | 0.05 | U | 0.20 | 0.24 |
| 450 | U | 1.32 | 0.52 | U | 0.74 | 0.35 | U | 0.31 | 0.28 |
| 451 | A | 0.80 | 0.10 | A | 0.55 | 0.04 | A | 0.39 | 0.08 |
| 452 | A | 0.82 | 0.16 | A | 0.50 | 0.09 | A | 0.45 | 0.12 |
| 453 | G | 1.01 | 0.15 | G | 0.59 | 0.18 | G | 0.43 | 0.20 |
| 454 | A | 1.05 | 0.18 | A | 0.72 | 0.22 | A | 0.27 | 0.15 |
| 455 | G | 0.69 | 0.11 | G | 0.45 | 0.13 | G | 0.24 | 0.19 |
| 456 | A | 1.41 | 0.10 | A | 0.95 | 0.23 | A | 0.60 | 0.20 |
| 457 | U | 0.79 | 0.08 | U | 0.51 | 0.08 | U | 0.37 | 0.20 |
| 458 | G | 1.60 | 0.14 | G | 0.82 | 0.13 | G | 0.65 | 0.47 |
| 459 | U | 2.00 | 0.00 | U | 1.51 | 0.45 | U | 0.54 | 0.40 |
| 460 | A | 0.97 | 0.19 | A | 0.87 | 0.15 | A | 0.46 | 0.28 |
| 461 | G | 0.98 | 0.17 | G | 1.05 | 0.15 | G | 0.50 | 0.31 |
| 462 | U | 1.84 | 0.27 | U | 1.24 | 0.67 | U | 0.47 | 0.27 |
| 463 | A | 0.51 | 0.38 | A | 0.46 | 0.23 | A | 0.33 | 0.14 |
| 464 | A | 0.15 | 0.27 | A | 0.56 | 0.18 | A | 0.19 | 0.11 |
| 465 | U | 0.16 | 0.07 | U | 0.54 | 0.06 | U | 0.17 | 0.10 |
| 466 | G | 0.05 | 0.08 | G | 0.35 | 0.06 | G | 0.06 | 0.05 |
| 467 | U | 0.25 | 0.44 | U | 0.85 | 0.75 | U | 0.00 | 0.00 |
| 468 | U | 0.03 | 0.03 | U | 0.54 | 0.36 | U | 0.00 | 0.00 |
| 469 | G | 0.03 | 0.05 | G | 0.09 | 0.13 | G | 0.01 | 0.03 |
| 470 | C | 0.11 | 0.20 | C | 0.21 | 0.15 | C | 1.20 | 0.98 |
| 471 | U | 0.03 | 0.05 | U | 0.11 | 0.14 | U | 0.00 | 0.00 |
| 472 | G | 0.00 | 0.00 | G | 0.00 | 0.00 | G | 0.00 | 0.00 |
| 473 | U | 0.05 | 0.09 | U | 0.31 | 0.12 | U | 0.00 | 0.00 |
| 474 | A | 0.00 | 0.00 | A | 0.05 | 0.09 | A | 0.00 | 0.00 |
| 475 | G | 0.19 | 0.10 | G | 0.16 | 0.28 | G | 0.00 | 0.00 |
| 476 | G | 1.75 | 0.17 | G | 1.68 | 0.23 | G | 0.78 | 0.29 |
| 477 | A | 1.86 | 0.24 | A | 1.37 | 0.10 | A | 0.50 | 0.28 |
| 478 | G | 1.53 | 0.46 | G | 0.75 | 0.53 | G | 0.31 | 0.26 |
| 479 | U | 2.00 | 0.00 | U | 1.48 | 0.48 | U | 0.65 | 0.28 |
| 480 | A | 0.75 | 0.09 | A | 0.42 | 0.19 | A | 0.39 | 0.07 |

| **Nucleotide number** | **Mean SHAPE Reactivities**  **(from 3 independent experiments)** | | | | | | | | |
| --- | --- | --- | --- | --- | --- | --- | --- | --- | --- |
| **AD26 (WT)** | | | **AD109*i*** | | | **AD111*i*** | | |
| **Sequence** | **Mean** | **SD** | **Sequence** | **Mean** | **SD** | **Sequence** | **Mean** | **SD** |
| 481 | G | 0.16 | 0.02 | G | 0.10 | 0.06 | G | 0.15 | 0.06 |
| 482 | G | 0.00 | 0.00 | G | 0.04 | 0.06 | G | 0.13 | 0.10 |
| 483 | G | 0.00 | 0.00 | G | 0.03 | 0.05 | G | 0.00 | 0.00 |
| 484 | G | 0.00 | 0.00 | G | 0.06 | 0.11 | G | 0.00 | 0.00 |
| 485 | G | 0.00 | 0.00 | G | 0.08 | 0.14 | G | 0.00 | 0.00 |
| 486 | G | 0.02 | 0.03 | G | 0.06 | 0.10 | G | 0.00 | 0.00 |
| 487 | A | 0.23 | 0.28 | A | 0.30 | 0.14 | A | 0.21 | 0.06 |
| 488 | A | 0.23 | 0.08 | A | 0.15 | 0.04 | A | 0.21 | 0.04 |
| 489 | G | 0.10 | 0.11 | G | 0.09 | 0.09 | G | 0.29 | 0.10 |
| 490 | A | 0.32 | 0.21 | A | 0.38 | 0.14 | A | 0.36 | 0.12 |
| 491 | G | 0.55 | 0.16 | G | 0.51 | 0.16 | G | 0.44 | 0.15 |
| 492 | U | 1.81 | 0.20 | U | 1.43 | 0.18 | U | 0.73 | 0.13 |
| 493 | A | 0.55 | 0.11 | A | 0.61 | 0.14 | A | 0.38 | 0.09 |
| 494 | A | 0.84 | 0.30 | A | 0.74 | 0.22 | A | 0.64 | 0.11 |
| 495 | A | 0.58 | 0.35 | A | 0.41 | 0.15 | A | 1.00 | 0.10 |
| 496 | A | 0.88 | 0.52 | A | 0.59 | 0.21 | A | 0.74 | 0.08 |
| 497 | A | 1.46 | 0.47 | A | 1.11 | 0.30 | A | 0.99 | 0.14 |
| 498 | A | 2.00 | 0.00 | A | 1.72 | 0.35 | A | 1.69 | 0.14 |
| 499 | U | 0.38 | 0.16 | U | 0.34 | 0.06 | U | 0.47 | 0.12 |
| 500 | U | 0.60 | 0.16 | U | 0.37 | 0.08 | U | 0.92 | 0.13 |
| 501 | U | 0.43 | 0.05 | U | 0.33 | 0.09 | U | 0.97 | 0.08 |
| 502 | G | 0.06 | 0.02 | G | 0.06 | 0.03 | G | 0.16 | 0.03 |
| 503 | G | 0.13 | 0.02 | G | 0.12 | 0.03 | G | 0.22 | 0.03 |
| 504 | A | 0.20 | 0.05 | A | 0.20 | 0.07 | A | 0.36 | 0.04 |
| 505 | G | 0.06 | 0.03 | G | 0.10 | 0.02 | G | 0.18 | 0.02 |
| 506 | A | 0.13 | 0.07 | A | 0.21 | 0.04 | A | 0.37 | 0.03 |
| 507 | A | 0.16 | 0.04 | A | 0.13 | 0.03 | A | 0.13 | 0.05 |
| 508 | G | 0.23 | 0.05 | G | 0.21 | 0.10 | G | 0.26 | 0.14 |
| 509 | G | 0.74 | 0.10 | G | 0.57 | 0.21 | G | 0.48 | 0.04 |
| 510 | G | 1.69 | 0.25 | G | 1.47 | 0.46 | G | 0.51 | 0.09 |
| 511 | A | 1.81 | 0.33 | A | 1.42 | 0.47 | A | 0.81 | 0.07 |

| **Nucleotide number** | **Mean SHAPE Reactivities**  **(from 3 independent experiments)** | | | | | | | | |
| --- | --- | --- | --- | --- | --- | --- | --- | --- | --- |
| **AD26 (WT)** | | | **AD113*i*** | | | **AD114*i*** | | |
| **Sequence** | **Mean** | **SD** | **Sequence** | **Mean** | **SD** | **Sequence** | **Mean** | **SD** |
| 1 | G | -999.00 | 0.00 | G | -999.00 | 0.00 | G | -999.00 | 0.00 |
| 2 | A | -999.00 | 0.00 | A | -999.00 | 0.00 | A | -999.00 | 0.00 |
| 3 | G | -999.00 | 0.00 | G | -999.00 | 0.00 | G | -999.00 | 0.00 |
| 4 | U | -999.00 | 0.00 | U | -999.00 | 0.00 | U | -999.00 | 0.00 |
| 5 | C | -999.00 | 0.00 | C | -999.00 | 0.00 | C | -999.00 | 0.00 |
| 6 | U | -999.00 | 0.00 | U | -999.00 | 0.00 | U | -999.00 | 0.00 |
| 7 | C | -999.00 | 0.00 | C | -999.00 | 0.00 | C | -999.00 | 0.00 |
| 8 | U | -999.00 | 0.00 | U | -999.00 | 0.00 | U | -999.00 | 0.00 |
| 9 | U | -999.00 | 0.00 | U | -999.00 | 0.00 | U | -999.00 | 0.00 |
| 10 | U | -999.00 | 0.00 | U | -999.00 | 0.00 | U | -999.00 | 0.00 |
| 11 | G | -999.00 | 0.00 | G | -999.00 | 0.00 | G | -999.00 | 0.00 |
| 12 | U | -999.00 | 0.00 | U | -999.00 | 0.00 | U | -999.00 | 0.00 |
| 13 | U | -999.00 | 0.00 | U | -999.00 | 0.00 | U | -999.00 | 0.00 |
| 14 | G | -999.00 | 0.00 | G | -999.00 | 0.00 | G | -999.00 | 0.00 |
| 15 | A | -999.00 | 0.00 | A | -999.00 | 0.00 | A | -999.00 | 0.00 |
| 16 | G | -999.00 | 0.00 | G | -999.00 | 0.00 | G | -999.00 | 0.00 |
| 17 | G | -999.00 | 0.00 | G | -999.00 | 0.00 | G | -999.00 | 0.00 |
| 18 | A | -999.00 | 0.00 | A | -999.00 | 0.00 | A | -999.00 | 0.00 |
| 19 | C | -999.00 | 0.00 | C | -999.00 | 0.00 | C | -999.00 | 0.00 |
| 20 | U | -999.00 | 0.00 | U | 0.18 | 0.01 | U | -999.00 | 0.00 |
| 21 | U | -999.00 | 0.00 | U | 0.85 | 0.10 | U | -999.00 | 0.00 |
| 22 | U | -999.00 | 0.00 | U | 1.42 | 0.20 | U | -999.00 | 0.00 |
| 23 | U | -999.00 | 0.00 | U | 1.96 | 0.05 | U | -999.00 | 0.00 |
| 24 | G | -999.00 | 0.00 | G | 2.00 | 0.00 | G | -999.00 | 0.00 |
| 25 | A | -999.00 | 0.00 | A | 0.85 | 0.14 | A | -999.00 | 0.00 |
| 26 | G | -999.00 | 0.00 | G | 0.10 | 0.05 | G | -999.00 | 0.00 |
| 27 | U | -999.00 | 0.00 | U | 0.01 | 0.01 | U | -999.00 | 0.00 |
| 28 | U | -999.00 | 0.00 | U | 0.01 | 0.01 | U | -999.00 | 0.00 |
| 29 | C | -999.00 | 0.00 | C | 0.01 | 0.01 | C | -999.00 | 0.00 |
| 30 | U | -999.00 | 0.00 | U | 0.00 | 0.00 | U | -999.00 | 0.00 |
| 31 | C | 0.00 | 0.01 | C | 0.00 | 0.00 | C | -999.00 | 0.00 |
| 32 | C | 0.06 | 0.10 | C | 0.00 | 0.00 | C | -999.00 | 0.00 |

| **Nucleotide number** | **Mean SHAPE Reactivities**  **(from 3 independent experiments)** | | | | | | | | |
| --- | --- | --- | --- | --- | --- | --- | --- | --- | --- |
| **AD26 (WT)** | | | **AD113*i*** | | | **AD114*i*** | | |
| **Sequence** | **Mean** | **SD** | **Sequence** | **Mean** | **SD** | **Sequence** | **Mean** | **SD** |
| 33 | C | -999.00 | 0.00 | C | -999.00 | 0.00 | C | -999.00 | 0.00 |
| 34 | U | -999.00 | 0.00 | U | 0.00 | 0.00 | U | -999.00 | 0.00 |
| 35 | U | 0.08 | 0.10 | U | 0.00 | 0.00 | U | -999.00 | 0.00 |
| 36 | G | 0.03 | 0.04 | G | 0.00 | 0.01 | G | -999.00 | 0.00 |
| 37 | A | 0.00 | 0.00 | A | 0.00 | 0.01 | A | -999.00 | 0.00 |
| 38 | G | 0.00 | 0.00 | G | 0.00 | 0.00 | G | -999.00 | 0.00 |
| 39 | G | 0.00 | 0.00 | G | 0.00 | 0.00 | G | -999.00 | 0.00 |
| 40 | C | 1.33 | 1.15 | C | 1.63 | 0.51 | C | -999.00 | 0.00 |
| 41 | U | 0.67 | 1.15 | U | 0.00 | 0.00 | U | -999.00 | 0.00 |
| 42 | C | -999.00 | 0.00 | C | 0.00 | 0.00 | C | -999.00 | 0.00 |
| 43 | C | -999.00 | 0.00 | C | 2.00 | 0.00 | C | -999.00 | 0.00 |
| 44 | C | 0.00 | 0.00 | C | 0.00 | 0.00 | C | -999.00 | 0.00 |
| 45 | A | 0.41 | 0.38 | A | 0.62 | 0.14 | A | -999.00 | 0.00 |
| 46 | C | 0.24 | 0.28 | C | 0.63 | 0.07 | C | -999.00 | 0.00 |
| 47 | A | 0.00 | 0.00 | A | 0.25 | 0.04 | A | -999.00 | 0.00 |
| 48 | G | 0.01 | 0.02 | G | 0.16 | 0.02 | G | -999.00 | 0.00 |
| 49 | A | 0.13 | 0.14 | A | 0.12 | 0.02 | A | -999.00 | 0.00 |
| 50 | U | 0.07 | 0.07 | U | 0.21 | 0.04 | U | -999.00 | 0.00 |
| 51 | A | 0.07 | 0.06 | A | 0.20 | 0.08 | A | -999.00 | 0.00 |
| 52 | C | -999.00 | 0.00 | C | 1.41 | 0.26 | C | -999.00 | 0.00 |
| 53 | A | 0.25 | 0.17 | A | 0.31 | 0.06 | A | -999.00 | 0.00 |
| 54 | A | 0.70 | 0.23 | A | 0.49 | 0.06 | A | -999.00 | 0.00 |
| 55 | U | 0.87 | 0.55 | U | 0.82 | 0.11 | U | -999.00 | 0.00 |
| 56 | A | 0.49 | 0.18 | A | 0.38 | 0.07 | A | -999.00 | 0.00 |
| 57 | A | 0.33 | 0.06 | A | 0.32 | 0.02 | A | -999.00 | 0.00 |
| 58 | A | 0.39 | 0.10 | A | 0.37 | 0.06 | A | -999.00 | 0.00 |
| 59 | U | 0.89 | 0.52 | U | 0.92 | 0.09 | U | -999.00 | 0.00 |
| 60 | A | 0.24 | 0.08 | A | 0.21 | 0.00 | A | 0.31 | 0.06 |
| 61 | U | 0.14 | 0.04 | U | 0.09 | 0.01 | U | 0.09 | 0.04 |
| 62 | U | 0.23 | 0.09 | U | 0.20 | 0.03 | U | 0.27 | 0.07 |
| 63 | U | 0.23 | 0.09 | U | 0.28 | 0.03 | U | 0.31 | 0.06 |
| 64 | G | 0.33 | 0.08 | G | 0.67 | 0.06 | G | 0.90 | 0.16 |

| **Nucleotide number** | **Mean SHAPE Reactivities**  **(from 3 independent experiments)** | | | | | | | | |
| --- | --- | --- | --- | --- | --- | --- | --- | --- | --- |
| **AD26 (WT)** | | | **AD113*i*** | | | **AD114*i*** | | |
| **Sequence** | **Mean** | **SD** | **Sequence** | **Mean** | **SD** | **Sequence** | **Mean** | **SD** |
| 65 | A | 0.26 | 0.04 | A | 0.40 | 0.03 | A | 0.53 | 0.13 |
| 66 | G | 0.20 | 0.03 | G | 0.29 | 0.02 | G | 0.43 | 0.11 |
| 67 | A | 0.22 | 0.11 | A | 0.17 | 0.02 | A | 0.25 | 0.05 |
| 68 | U | 0.30 | 0.14 | U | 0.30 | 0.03 | U | 0.52 | 0.07 |
| 69 | U | 0.30 | 0.18 | U | 0.79 | 0.03 | U | 1.02 | 0.12 |
| 70 | G | 0.30 | 0.16 | G | 0.78 | 0.00 | G | 0.92 | 0.14 |
| 71 | A | 0.20 | 0.14 | A | 1.32 | 0.09 | A | 1.65 | 0.26 |
| 72 | A | 0.05 | 0.06 | A | 0.38 | 0.03 | A | 0.48 | 0.11 |
| 73 | C | 0.01 | 0.02 | C | 0.02 | 0.01 | C | 0.04 | 0.03 |
| 74 | C | 0.00 | 0.01 | C | 0.00 | 0.00 | C | 0.00 | 0.00 |
| 75 | C | 0.07 | 0.03 | C | 0.00 | 0.00 | C | 0.00 | 0.00 |
| 76 | U | 0.02 | 0.03 | U | 0.15 | 0.01 | U | 0.43 | 0.11 |
| 77 | G | 0.08 | 0.02 | G | 0.22 | 0.01 | G | 0.63 | 0.12 |
| 78 | U | 0.14 | 0.06 | U | 0.17 | 0.03 | U | 0.21 | 0.05 |
| 79 | C | 0.32 | 0.24 | C | 0.39 | 0.07 | C | 0.18 | 0.05 |
| 80 | G | 1.13 | 0.30 | G | 2.00 | 0.00 | G | 1.53 | 0.28 |
| 81 | A | 1.67 | 0.39 | A | 1.10 | 0.09 | A | 1.40 | 0.27 |
| 82 | G | 0.49 | 0.15 | G | 0.79 | 0.05 | G | 1.67 | 0.27 |
| 83 | U | 0.87 | 0.34 | U | 0.73 | 0.10 | U | 0.91 | 0.59 |
| 84 | A | 0.93 | 0.19 | A | 0.71 | 0.14 | A | 1.74 | 0.23 |
| 85 | U | 0.31 | 0.09 | U → U | 0.32 | 0.03 | U | 0.65 | 0.09 |
| 86 | C | 0.10 | 0.03 | C | 0.09 | 0.05 | C | 0.15 | 0.12 |
| 87 | U | 0.16 | 0.03 | U → C | 0.66 | 0.24 | U → U | 0.46 | 0.50 |
| 88 | G | 0.70 | 0.12 | G → A | 0.28 | 0.07 | G → A | 0.91 | 0.09 |
| 89 | U | 0.84 | 0.13 | U | 0.44 | 0.01 | U | 0.53 | 0.06 |
| 90 | G | 2.00 | 0.00 | G | 1.32 | 0.07 | G | 1.67 | 0.18 |
| 91 | U | 2.00 | 0.00 | U | 1.54 | 0.24 | U | 1.25 | 0.37 |
| 92 | A | 0.84 | 0.10 | A | 0.56 | 0.06 | A | 0.53 | 0.06 |
| 93 | A | 0.32 | 0.09 | A | 0.20 | 0.04 | A | 0.18 | 0.01 |
| 94 | U | 0.10 | 0.06 | U | 0.03 | 0.01 | U | 0.04 | 0.04 |
| 95 | C | 0.04 | 0.04 | C | 0.01 | 0.01 | C | 0.01 | 0.01 |
| 96 | U | 0.48 | 0.07 | U | 0.03 | 0.05 | U | 0.05 | 0.04 |

| **Nucleotide number** | **Mean SHAPE Reactivities**  **(from 3 independent experiments)** | | | | | | | | |
| --- | --- | --- | --- | --- | --- | --- | --- | --- | --- |
| **AD26 (WT)** | | | **AD113*i*** | | | **AD114*i*** | | |
| **Sequence** | **Mean** | **SD** | **Sequence** | **Mean** | **SD** | **Sequence** | **Mean** | **SD** |
| 97 | U | 0.16 | 0.06 | U | 0.10 | 0.02 | U | 0.15 | 0.04 |
| 98 | U | 0.13 | 0.05 | U | 0.09 | 0.02 | U | 0.12 | 0.03 |
| 99 | U | 0.15 | 0.05 | U | 0.11 | 0.02 | U | 0.12 | 0.02 |
| 100 | U | 0.26 | 0.10 | U | 0.07 | 0.01 | U | 0.06 | 0.02 |
| 101 | U | 0.53 | 0.41 | U | 0.11 | 0.02 | U | 0.12 | 0.11 |
| 102 | A | 0.08 | 0.06 | A | 0.01 | 0.01 | A | 0.02 | 0.01 |
| 103 | C | 0.04 | 0.04 | C | 0.01 | 0.01 | C | 0.01 | 0.01 |
| 104 | C | 0.18 | 0.07 | C | 0.02 | 0.03 | C | 0.07 | 0.06 |
| 105 | U | 0.47 | 0.11 | U | 0.08 | 0.06 | U | 0.10 | 0.05 |
| 106 | G | 0.12 | 0.02 | G | 0.10 | 0.01 | G | 0.11 | 0.04 |
| 107 | U | 0.10 | 0.02 | U | 0.03 | 0.01 | U | 0.05 | 0.02 |
| 108 | G | 0.01 | 0.01 | G | 0.00 | 0.00 | G | 0.00 | 0.00 |
| 109 | A | 0.04 | 0.03 | A | 0.02 | 0.01 | A | 0.03 | 0.01 |
| 110 | G | 0.00 | 0.00 | G | 0.01 | 0.01 | G | 0.00 | 0.00 |
| 111 | G | 0.02 | 0.03 | G | 0.00 | 0.00 | G | 0.00 | 0.00 |
| 112 | U | 0.02 | 0.03 | U | 0.02 | 0.02 | U | 0.05 | 0.03 |
| 113 | C | 0.14 | 0.08 | C | 0.01 | 0.02 | C | 0.01 | 0.02 |
| 114 | U | 0.07 | 0.05 | U | 0.00 | 0.00 | U | 0.00 | 0.00 |
| 115 | C | 0.01 | 0.02 | C | 0.00 | 0.00 | C | 0.00 | 0.00 |
| 116 | G | 0.00 | 0.00 | G | 0.00 | 0.00 | G | 0.00 | 0.00 |
| 117 | G | 0.01 | 0.01 | G | 0.00 | 0.00 | G | 0.00 | 0.00 |
| 118 | A | 1.12 | 0.16 | A | 0.89 | 0.05 | A | 1.01 | 0.10 |
| 119 | A | 2.00 | 0.00 | A | 1.21 | 0.04 | A | 1.36 | 0.13 |
| 120 | U | 0.47 | 0.11 | U | 0.38 | 0.01 | U | 0.40 | 0.06 |
| 121 | C | 0.15 | 0.04 | C | 0.16 | 0.02 | C | 0.16 | 0.01 |
| 122 | C | 0.16 | 0.04 | C | 0.17 | 0.02 | C | 0.17 | 0.02 |
| 123 | G | 0.63 | 0.15 | G | 0.61 | 0.02 | G | 0.65 | 0.06 |
| 124 | G | 0.85 | 0.19 | G | 0.65 | 0.03 | G | 0.69 | 0.07 |
| 125 | G | 0.19 | 0.07 | G | 0.06 | 0.06 | G | 0.00 | 0.00 |
| 126 | C | 0.05 | 0.03 | C | 0.00 | 0.00 | C | 0.00 | 0.00 |
| 127 | C | 0.00 | 0.00 | C | 0.00 | 0.00 | C | 0.00 | 0.00 |
| 128 | G | 0.00 | 0.00 | G | 0.00 | 0.00 | G | 0.00 | 0.00 |

| **Nucleotide number** | **Mean SHAPE Reactivities**  **(from 3 independent experiments)** | | | | | | | | |
| --- | --- | --- | --- | --- | --- | --- | --- | --- | --- |
| **AD26 (WT)** | | | **AD113*i*** | | | **AD114*i*** | | |
| **Sequence** | **Mean** | **SD** | **Sequence** | **Mean** | **SD** | **Sequence** | **Mean** | **SD** |
| 129 | A | 0.02 | 0.02 | A | 0.02 | 0.02 | A | 0.02 | 0.02 |
| 130 | G | 0.07 | 0.07 | G | 0.82 | 0.05 | G | 0.30 | 0.11 |
| 131 | A | 2.00 | 0.00 | A | 2.00 | 0.00 | A | 2.00 | 0.00 |
| 132 | A | 1.87 | 0.21 | A | 1.49 | 0.08 | A | 1.67 | 0.16 |
| 133 | C | 0.21 | 0.03 | C | 0.34 | 0.03 | C | 0.28 | 0.05 |
| 134 | U | 0.05 | 0.02 | U | 0.05 | 0.01 | U | 0.03 | 0.02 |
| 135 | U | 0.03 | 0.03 | U | 0.02 | 0.01 | U | 0.03 | 0.01 |
| 136 | C | 0.00 | 0.00 | C | 0.00 | 0.00 | C | 0.00 | 0.01 |
| 137 | G | 0.03 | 0.03 | G | 0.01 | 0.01 | G | 0.01 | 0.01 |
| 138 | C | 0.32 | 0.34 | C | 0.04 | 0.07 | C | 0.03 | 0.07 |
| 139 | A | 0.72 | 0.04 | A | 0.27 | 0.09 | A | 0.19 | 0.09 |
| 140 | G | 0.13 | 0.14 | G | 0.03 | 0.04 | G | 0.00 | 0.00 |
| 141 | U | 0.11 | 0.06 | U | 0.03 | 0.04 | U | 0.00 | 0.00 |
| 142 | U | 0.04 | 0.04 | U | 0.02 | 0.02 | U | 0.00 | 0.00 |
| 143 | G | 0.00 | 0.00 | G | 0.00 | 0.00 | G | 0.00 | 0.00 |
| 144 | G | 0.01 | 0.02 | G | 0.01 | 0.01 | G | 0.00 | 0.00 |
| 145 | C | 0.14 | 0.10 | C | 0.03 | 0.04 | C | 0.01 | 0.01 |
| 146 | G | 0.04 | 0.06 | G | 0.01 | 0.01 | G | 0.01 | 0.01 |
| 147 | C | 0.15 | 0.17 | C | 0.00 | 0.00 | C | 0.00 | 0.00 |
| 148 | C | 0.35 | 0.04 | C | 0.00 | 0.00 | C | 0.00 | 0.00 |
| 149 | C | 0.30 | 0.15 | C | 0.02 | 0.04 | C | 0.00 | 0.00 |
| 150 | G | 0.31 | 0.08 | G | 0.35 | 0.09 | G | 0.47 | 0.08 |
| 151 | A | 0.06 | 0.01 | A | 0.08 | 0.04 | A | 0.11 | 0.03 |
| 152 | A | 0.02 | 0.03 | A | 0.49 | 0.30 | A | 0.00 | 0.01 |
| 153 | C | -999.00 | 0.00 | C | 1.61 | 0.60 | C | 0.52 | 0.76 |
| 154 | A | 0.03 | 0.03 | A | 0.02 | 0.04 | A | 0.05 | 0.05 |
| 155 | G | 0.02 | 0.03 | G | 0.00 | 0.00 | G | 0.03 | 0.08 |
| 156 | G | 0.02 | 0.04 | G | 0.00 | 0.00 | G | 1.54 | 0.81 |
| 157 | G | 0.04 | 0.06 | G | 0.00 | 0.00 | G | 1.83 | 0.26 |
| 158 | A | 0.05 | 0.09 | A | 0.07 | 0.12 | A | 0.00 | 0.00 |
| 159 | C | 0.03 | 0.04 | C | 0.04 | 0.05 | C | 0.01 | 0.02 |
| 160 | U | 0.00 | 0.00 | U | 0.03 | 0.05 | U | 0.01 | 0.02 |

| **Nucleotide number** | **Mean SHAPE Reactivities**  **(from 3 independent experiments)** | | | | | | | | |
| --- | --- | --- | --- | --- | --- | --- | --- | --- | --- |
| **AD26 (WT)** | | | **AD113*i*** | | | **AD114*i*** | | |
| **Sequence** | **Mean** | **SD** | **Sequence** | **Mean** | **SD** | **Sequence** | **Mean** | **SD** |
| 161 | U | 0.00 | 0.00 | U | 0.00 | 0.01 | U | 0.00 | 0.01 |
| 162 | G | 0.00 | 0.00 | G | 0.00 | 0.00 | G | 0.00 | 0.00 |
| 163 | A | 0.05 | 0.03 | A | 0.01 | 0.01 | A | 0.01 | 0.01 |
| 164 | U | 0.05 | 0.02 | U | 0.02 | 0.02 | U | 0.02 | 0.01 |
| 165 | U | 0.01 | 0.01 | U | 0.13 | 0.02 | U | 0.11 | 0.03 |
| 166 | G | 0.09 | 0.05 | G | 0.58 | 0.05 | G | 0.53 | 0.06 |
| 167 | A | 0.49 | 0.07 | A | 0.63 | 0.03 | A | 0.63 | 0.07 |
| 168 | G | 0.02 | 0.03 | G | 0.08 | 0.01 | G | 0.04 | 0.02 |
| 169 | A | 0.01 | 0.01 | A | 0.02 | 0.01 | A | 0.02 | 0.01 |
| 170 | G | 0.02 | 0.03 | G | 0.11 | 0.02 | G | 0.10 | 0.02 |
| 171 | U | 1.02 | 0.28 | U | 1.55 | 0.11 | U | 1.51 | 0.07 |
| 172 | G | 1.07 | 0.13 | G | 1.51 | 0.10 | G | 1.40 | 0.09 |
| 173 | A | 1.27 | 0.29 | A | 0.98 | 0.07 | A | 1.00 | 0.07 |
| 174 | U | 0.38 | 0.09 | U | 0.42 | 0.03 | U | 0.46 | 0.04 |
| 175 | U | 0.34 | 0.06 | U | 0.36 | 0.06 | U | 0.40 | 0.02 |
| 176 | G | 0.00 | 0.01 | G | 0.01 | 0.02 | G | 0.02 | 0.01 |
| 177 | A | 0.03 | 0.03 | A | 0.00 | 0.00 | A | 0.01 | 0.00 |
| 178 | G | 0.02 | 0.02 | G | 0.00 | 0.00 | G | 0.00 | 0.00 |
| 179 | G | 0.00 | 0.00 | G | 0.00 | 0.00 | G | 0.00 | 0.00 |
| 180 | A | 0.37 | 0.20 | A | 0.31 | 0.04 | A | 0.32 | 0.02 |
| 181 | A | 0.34 | 0.03 | A | 0.25 | 0.02 | A | 0.23 | 0.02 |
| 182 | G | 0.06 | 0.09 | G | 0.03 | 0.00 | G | 0.02 | 0.01 |
| 183 | U | 0.04 | 0.04 | U | 0.08 | 0.01 | U | 0.04 | 0.01 |
| 184 | G | 0.06 | 0.01 | G | 0.64 | 0.03 | G | 0.56 | 0.06 |
| 185 | A | 1.62 | 0.66 | A | 1.54 | 0.09 | A | 1.62 | 0.16 |
| 186 | A | 0.63 | 0.37 | A | 0.25 | 0.02 | A | 0.25 | 0.04 |
| 187 | G | 0.08 | 0.12 | G | 0.00 | 0.00 | G | 0.00 | 0.01 |
| 188 | C | 0.01 | 0.01 | C | 0.00 | 0.00 | C | 0.00 | 0.00 |
| 189 | U | 0.03 | 0.05 | U | 0.02 | 0.02 | U | 0.01 | 0.02 |
| 190 | A | 0.01 | 0.02 | A | 0.03 | 0.01 | A | 0.02 | 0.01 |
| 191 | G | 0.00 | 0.00 | G | 0.02 | 0.01 | G | 0.01 | 0.02 |
| 192 | A | 0.00 | 0.00 | A | 0.00 | 0.00 | A | 0.00 | 0.00 |

| **Nucleotide number** | **Mean SHAPE Reactivities**  **(from 3 independent experiments)** | | | | | | | | |
| --- | --- | --- | --- | --- | --- | --- | --- | --- | --- |
| **AD26 (WT)** | | | **AD113*i*** | | | **AD114*i*** | | |
| **Sequence** | **Mean** | **SD** | **Sequence** | **Mean** | **SD** | **Sequence** | **Mean** | **SD** |
| 193 | G | 0.08 | 0.03 | G | 0.14 | 0.05 | G | 0.07 | 0.06 |
| 194 | C | 1.56 | 0.37 | C | 1.69 | 0.10 | C | 1.42 | 0.07 |
| 195 | A | 2.00 | 0.00 | A | 2.00 | 0.00 | A | 2.00 | 0.00 |
| 196 | A | 1.99 | 0.02 | A | 1.88 | 0.16 | A | 1.57 | 0.14 |
| 197 | U | 1.98 | 0.04 | U | 1.48 | 0.04 | U | 1.33 | 0.07 |
| 198 | A | 0.53 | 0.05 | A | 0.30 | 0.02 | A | 0.27 | 0.05 |
| 199 | G | 0.15 | 0.05 | G | 0.03 | 0.01 | G | 0.01 | 0.01 |
| 200 | A | 0.54 | 0.07 | A | 0.38 | 0.02 | A | 0.37 | 0.03 |
| 201 | A | 0.12 | 0.02 | A | 0.16 | 0.02 | A | 0.14 | 0.01 |
| 202 | A | 0.55 | 0.11 | A | 0.40 | 0.04 | A | 0.41 | 0.04 |
| 203 | G | 0.01 | 0.01 | G | 0.01 | 0.01 | G | 0.01 | 0.01 |
| 204 | C | 0.03 | 0.04 | C | 0.00 | 0.00 | C | 0.00 | 0.00 |
| 205 | U | 0.00 | 0.00 | U | 0.00 | 0.00 | U | 0.00 | 0.00 |
| 206 | G | 0.00 | 0.00 | G | 0.00 | 0.00 | G | 0.00 | 0.00 |
| 207 | U | 0.02 | 0.04 | U | 0.02 | 0.01 | U | 0.01 | 0.01 |
| 208 | U | 0.47 | 0.14 | U | 0.59 | 0.06 | U | 0.49 | 0.09 |
| 209 | A | 2.00 | 0.00 | A | 2.00 | 0.00 | A | 2.00 | 0.00 |
| 210 | A | 2.00 | 0.00 | A | 2.00 | 0.00 | A | 1.99 | 0.02 |
| 211 | G | 0.22 | 0.01 | G | 0.11 | 0.02 | G | 0.05 | 0.03 |
| 212 | C | 0.03 | 0.05 | C | 0.00 | 0.00 | C | 0.00 | 0.00 |
| 213 | A | 0.07 | 0.11 | A | 0.00 | 0.00 | A | 0.00 | 0.00 |
| 214 | G | 0.00 | 0.00 | G | 0.00 | 0.00 | G | 0.00 | 0.00 |
| 215 | A | 0.32 | 0.04 | A | 0.32 | 0.01 | A | 0.32 | 0.02 |
| 216 | A | 0.17 | 0.13 | A | 0.30 | 0.02 | A | 0.32 | 0.04 |
| 217 | C | 0.02 | 0.02 | C | 0.02 | 0.01 | C | 0.01 | 0.01 |
| 218 | U | 0.02 | 0.02 | U | 0.02 | 0.01 | U | 0.02 | 0.01 |
| 219 | C | 0.01 | 0.01 | C | 0.00 | 0.00 | C | 0.00 | 0.00 |
| 220 | C | 0.00 | 0.00 | C | 0.00 | 0.00 | C | 0.00 | 0.00 |
| 221 | U | 0.00 | 0.00 | U | 0.00 | 0.00 | U | 0.00 | 0.00 |
| 222 | G | 0.00 | 0.00 | G | 0.00 | 0.00 | G | 0.00 | 0.00 |
| 223 | C | 0.06 | 0.04 | C | 0.03 | 0.00 | C | 0.01 | 0.01 |
| 224 | U | 0.27 | 0.07 | U | 0.10 | 0.02 | U | 0.08 | 0.03 |

| **Nucleotide number** | **Mean SHAPE Reactivities**  **(from 3 independent experiments)** | | | | | | | | |
| --- | --- | --- | --- | --- | --- | --- | --- | --- | --- |
| **AD26 (WT)** | | | **AD113*i*** | | | **AD114*i*** | | |
| **Sequence** | **Mean** | **SD** | **Sequence** | **Mean** | **SD** | **Sequence** | **Mean** | **SD** |
| 225 | G | 0.11 | 0.09 | G | 0.49 | 0.03 | G | 0.42 | 0.03 |
| 226 | A | 1.30 | 0.18 | A | 0.49 | 0.01 | A | 0.43 | 0.09 |
| 227 | C | 0.12 | 0.02 | C | 0.07 | 0.01 | C | 0.02 | 0.02 |
| 228 | C | 1.30 | 0.46 | C | 0.50 | 0.04 | C | 0.25 | 0.09 |
| 229 | U | 1.98 | 0.04 | U | 1.75 | 0.07 | U | 1.26 | 0.21 |
| 230 | A | 2.00 | 0.00 | A | 2.00 | 0.00 | A | 2.00 | 0.00 |
| 231 | A | 1.25 | 0.29 | A | 2.00 | 0.00 | A | 2.00 | 0.00 |
| 232 | A | 2.00 | 0.00 | A | 2.00 | 0.00 | A | 2.00 | 0.00 |
| 233 | U | 2.00 | 0.00 | U | 2.00 | 0.00 | U | 2.00 | 0.00 |
| 234 | A | 0.87 | 0.14 | A | 0.52 | 0.11 | A | 0.53 | 0.05 |
| 235 | G | 0.10 | 0.08 | G | 0.02 | 0.03 | G | 0.01 | 0.01 |
| 236 | G | 0.03 | 0.03 | G | 0.00 | 0.00 | G | 0.00 | 0.00 |
| 237 | G | 0.00 | 0.00 | G | 0.00 | 0.00 | G | 0.00 | 0.00 |
| 238 | A | 0.29 | 0.05 | A | 0.21 | 0.03 | A | 0.17 | 0.03 |
| 239 | A | 0.12 | 0.05 | A | 0.09 | 0.03 | A | 0.07 | 0.03 |
| 240 | G | 0.01 | 0.01 | G | 0.03 | 0.02 | G | 0.01 | 0.02 |
| 241 | C | 0.02 | 0.04 | C | 0.00 | 0.00 | C | 0.00 | 0.00 |
| 242 | A | 0.08 | 0.08 | A | 0.00 | 0.00 | A | 0.00 | 0.00 |
| 243 | G | 0.21 | 0.07 | G | 0.34 | 0.03 | G | 0.23 | 0.07 |
| 244 | U | 2.00 | 0.00 | U | 2.00 | 0.00 | U | 1.71 | 0.25 |
| 245 | A | 1.67 | 0.57 | A | 1.68 | 0.12 | A | 1.30 | 0.12 |
| 246 | G | 0.36 | 0.40 | G | 0.28 | 0.09 | G | 0.22 | 0.04 |
| 247 | C | 1.02 | 0.04 | C | 0.82 | 0.09 | C | 0.68 | 0.10 |
| 248 | A | 1.78 | 0.19 | A | 1.00 | 0.13 | A | 0.91 | 0.11 |
| 249 | G | 0.34 | 0.09 | G | 0.48 | 0.10 | G | 0.41 | 0.05 |
| 250 | A | 0.83 | 0.17 | A | 0.90 | 0.13 | A | 0.91 | 0.08 |
| 251 | C | 0.90 | 0.18 | C | 0.86 | 0.08 | C | 0.81 | 0.08 |
| 252 | G | 0.33 | 0.07 | G | 0.30 | 0.01 | G | 0.27 | 0.03 |
| 253 | C | 0.02 | 0.02 | C | 0.00 | 0.00 | C | 0.00 | 0.00 |
| 254 | U | 0.00 | 0.00 | U | 0.00 | 0.00 | U | 0.00 | 0.00 |
| 255 | G | 0.01 | 0.01 | G | 0.02 | 0.02 | G | 0.02 | 0.02 |
| 256 | C | 0.01 | 0.01 | C | 0.00 | 0.00 | C | 0.00 | 0.00 |

| **Nucleotide number** | **Mean SHAPE Reactivities**  **(from 3 independent experiments)** | | | | | | | | |
| --- | --- | --- | --- | --- | --- | --- | --- | --- | --- |
| **AD26 (WT)** | | | **AD113*i*** | | | **AD114*i*** | | |
| **Sequence** | **Mean** | **SD** | **Sequence** | **Mean** | **SD** | **Sequence** | **Mean** | **SD** |
| 257 | U | 0.01 | 0.01 | U | 0.00 | 0.00 | U | 0.00 | 0.00 |
| 258 | A | 0.02 | 0.03 | A | 0.03 | 0.01 | A | 0.04 | 0.02 |
| 259 | A | 0.01 | 0.02 | A | 0.01 | 0.01 | A | 0.02 | 0.01 |
| 260 | C | 0.01 | 0.02 | C | 0.00 | 0.01 | C | 0.01 | 0.01 |
| 261 | A | 0.07 | 0.06 | A | 0.00 | 0.00 | A | 0.00 | 0.00 |
| 262 | G | 0.01 | 0.01 | G | 0.00 | 0.00 | G | 0.00 | 0.00 |
| 263 | U | 0.10 | 0.03 | U | 0.15 | 0.01 | U | 0.11 | 0.02 |
| 264 | G | 0.02 | 0.02 | G | 0.07 | 0.02 | G | 0.03 | 0.02 |
| 265 | A | 0.15 | 0.02 | A | 0.21 | 0.02 | A | 0.15 | 0.02 |
| 266 | G | 0.55 | 0.07 | G | 0.39 | 0.02 | G | 0.34 | 0.05 |
| 267 | U | 0.15 | 0.13 | U | 0.08 | 0.04 | U | 0.05 | 0.05 |
| 268 | A | 0.13 | 0.03 | A | 0.12 | 0.02 | A | 0.13 | 0.02 |
| 269 | U | 0.06 | 0.04 | U | 0.10 | 0.01 | U | 0.13 | 0.03 |
| 270 | C | 0.02 | 0.02 | C | 0.00 | 0.00 | C | 0.00 | 0.00 |
| 271 | U | 0.21 | 0.08 | U | 0.00 | 0.00 | U | 0.00 | 0.01 |
| 272 | C | 0.02 | 0.03 | C | 0.00 | 0.00 | C | 0.00 | 0.01 |
| 273 | U | 0.04 | 0.06 | U | 0.02 | 0.02 | U | 0.00 | 0.00 |
| 274 | A | 0.00 | 0.00 | A | 0.01 | 0.02 | A | 0.01 | 0.01 |
| 275 | G | 0.00 | 0.00 | G | 0.00 | 0.00 | G | 0.00 | 0.00 |
| 276 | U | 0.32 | 0.02 | U | 0.25 | 0.03 | U | 0.18 | 0.08 |
| 277 | G | 0.12 | 0.03 | G | 0.27 | 0.01 | G | 0.16 | 0.06 |
| 278 | A | 1.69 | 0.43 | A | 2.00 | 0.00 | A | 1.95 | 0.07 |
| 279 | A | 0.13 | 0.08 | A | 0.26 | 0.01 | A | 0.15 | 0.06 |
| 280 | G | 0.02 | 0.03 | G | 0.04 | 0.04 | G | 0.04 | 0.02 |
| 281 | C | 0.00 | 0.00 | C | 0.00 | 0.00 | C | 0.00 | 0.00 |
| 282 | G | 0.05 | 0.02 | G | 0.03 | 0.03 | G | 0.01 | 0.01 |
| 283 | G | 0.67 | 0.24 | G | 0.84 | 0.03 | G | 0.71 | 0.10 |
| 284 | A | 0.30 | 0.09 | A | 0.33 | 0.01 | A | 0.32 | 0.04 |
| 285 | C | 0.02 | 0.02 | C | 0.00 | 0.00 | C | 0.00 | 0.00 |
| 286 | U | 0.00 | 0.00 | U | 0.00 | 0.00 | U | 0.00 | 0.00 |
| 287 | C | 0.04 | 0.06 | C | 0.00 | 0.00 | C | 0.00 | 0.00 |
| 288 | G | 0.10 | 0.09 | G | 0.14 | 0.06 | G | 0.10 | 0.08 |

| **Nucleotide number** | **Mean SHAPE Reactivities**  **(from 3 independent experiments)** | | | | | | | | |
| --- | --- | --- | --- | --- | --- | --- | --- | --- | --- |
| **AD26 (WT)** | | | **AD113*i*** | | | **AD114*i*** | | |
| **Sequence** | **Mean** | **SD** | **Sequence** | **Mean** | **SD** | **Sequence** | **Mean** | **SD** |
| 289 | A | 0.30 | 0.10 | A | 0.38 | 0.03 | A | 0.35 | 0.09 |
| 290 | G | 0.02 | 0.03 | G | 0.01 | 0.01 | G | 0.02 | 0.01 |
| 291 | C | 0.16 | 0.15 | C | 0.00 | 0.00 | C | 0.00 | 0.00 |
| 292 | U | 0.03 | 0.03 | U | 0.04 | 0.02 | U | 0.01 | 0.01 |
| 293 | C | 0.00 | 0.00 | C | 0.16 | 0.10 | C | 0.03 | 0.03 |
| 294 | A | 0.65 | 0.14 | A | 0.78 | 0.05 | A | 0.71 | 0.06 |
| 295 | U | 0.81 | 0.15 | U | 1.08 | 0.07 | U | 0.92 | 0.07 |
| 296 | A | 0.15 | 0.03 | A | 0.22 | 0.09 | A | 0.16 | 0.06 |
| 297 | A | 0.05 | 0.03 | A | 0.10 | 0.08 | A | 0.06 | 0.04 |
| 298 | U | 0.01 | 0.01 | U | 0.02 | 0.03 | U | 0.01 | 0.01 |
| 299 | C | 0.02 | 0.04 | C | 0.00 | 0.00 | C | 0.00 | 0.00 |
| 300 | A | 0.02 | 0.03 | A | 0.00 | 0.00 | A | 0.00 | 0.00 |
| 301 | A | 0.02 | 0.03 | A | 0.00 | 0.00 | A | 0.00 | 0.00 |
| 302 | G | 0.15 | 0.25 | G | 1.83 | 0.29 | G | 1.40 | 0.93 |
| 303 | U | 0.11 | 0.20 | U | 1.16 | 0.48 | U | 0.00 | 0.00 |
| 304 | C | 0.10 | 0.17 | C | 0.00 | 0.00 | C | 0.00 | 0.00 |
| 305 | A | 1.03 | 0.42 | A | 0.44 | 0.07 | A | 0.38 | 0.16 |
| 306 | U | 0.44 | 0.25 | U | 0.19 | 0.01 | U | 0.19 | 0.12 |
| 307 | U | 0.03 | 0.04 | U | 0.00 | 0.00 | U | 0.03 | 0.04 |
| 308 | G | 0.07 | 0.06 | G | 0.09 | 0.04 | G | 0.06 | 0.05 |
| 309 | U | -999.00 | 0.00 | U | 0.13 | 0.14 | U | 0.08 | 0.08 |
| 310 | U | 0.46 | 0.30 | U | 0.73 | 0.55 | U | 0.56 | 0.21 |
| 311 | U | 0.56 | 0.50 | U | 1.76 | 0.22 | U | 1.19 | 0.27 |
| 312 | A | 1.26 | 0.32 | A | 1.94 | 0.08 | A | 1.98 | 0.04 |
| 313 | A | 0.95 | 0.17 | A | 1.52 | 0.03 | A | 1.79 | 0.13 |
| 314 | A | 1.01 | 0.18 | A | 1.31 | 0.11 | A | 1.26 | 0.29 |
| 315 | G | 0.06 | 0.03 | G | 0.14 | 0.01 | G | 0.08 | 0.06 |
| 316 | G | 0.03 | 0.03 | G | 0.07 | 0.01 | G | 0.02 | 0.02 |
| 317 | C | 0.00 | 0.00 | C | 0.01 | 0.01 | C | 0.00 | 0.00 |
| 318 | C | 0.05 | 0.09 | C | 0.05 | 0.05 | C | 0.01 | 0.01 |
| 319 | C | 0.01 | 0.02 | C | 0.00 | 0.00 | C | 0.00 | 0.00 |
| 320 | A | -999.00 | 0.00 | A | 0.14 | 0.09 | A | 0.03 | 0.04 |

| **Nucleotide number** | **Mean SHAPE Reactivities**  **(from 3 independent experiments)** | | | | | | | | |
| --- | --- | --- | --- | --- | --- | --- | --- | --- | --- |
| **AD26 (WT)** | | | **AD113*i*** | | | **AD114*i*** | | |
| **Sequence** | **Mean** | **SD** | **Sequence** | **Mean** | **SD** | **Sequence** | **Mean** | **SD** |
| 321 | G | 0.01 | 0.01 | G | 0.00 | 0.00 | G | 0.00 | 0.00 |
| 322 | A | 1.08 | 0.61 | A | 0.51 | 0.02 | A | 0.38 | 0.10 |
| 323 | U | 0.78 | 0.23 | U | 0.71 | 0.09 | U | 0.82 | 0.14 |
| 324 | A | 1.35 | 0.38 | A | 2.00 | 0.00 | A | 2.00 | 0.00 |
| 325 | A | 2.00 | 0.00 | A | 2.00 | 0.00 | A | 2.00 | 0.00 |
| 326 | A | 2.00 | 0.00 | A | 2.00 | 0.00 | A | 2.00 | 0.00 |
| 327 | U | 2.00 | 0.00 | U | 2.00 | 0.00 | U | 2.00 | 0.00 |
| 328 | U | 1.92 | 0.14 | U | 2.00 | 0.00 | U | 2.00 | 0.00 |
| 329 | A | 2.00 | 0.00 | A | 1.94 | 0.06 | A | 1.95 | 0.08 |
| 330 | C | 1.60 | 0.45 | C | 0.78 | 0.22 | C | 0.66 | 0.28 |
| 331 | A | 0.34 | 0.38 | A | 0.07 | 0.06 | A | 0.04 | 0.05 |
| 332 | U | 0.07 | 0.10 | U | 0.00 | 0.01 | U | 0.02 | 0.02 |
| 333 | C | 0.00 | 0.01 | C | 0.02 | 0.02 | C | 0.06 | 0.06 |
| 334 | U | 0.00 | 0.00 | U | 0.00 | 0.01 | U | 0.03 | 0.04 |
| 335 | G | 0.00 | 0.00 | G | 0.00 | 0.00 | G | 0.01 | 0.02 |
| 336 | G | 0.00 | 0.01 | G | 0.00 | 0.00 | G | 0.00 | 0.00 |
| 337 | U | 0.02 | 0.04 | U | 0.03 | 0.05 | U | 0.00 | 0.00 |
| 338 | G | 0.16 | 0.08 | G | 0.33 | 0.06 | G | 0.31 | 0.07 |
| 339 | A | 0.50 | 0.13 | A | 0.46 | 0.02 | A | 0.45 | 0.06 |
| 340 | C | 0.10 | 0.06 | C | 0.06 | 0.01 | C | 0.06 | 0.02 |
| 341 | U | 0.15 | 0.02 | U | 0.08 | 0.03 | U | 0.08 | 0.02 |
| 342 | C | 0.18 | 0.04 | C | 0.00 | 0.01 | C | 0.04 | 0.05 |
| 343 | U | 0.15 | 0.15 | U | 0.09 | 0.04 | U | 0.05 | 0.04 |
| 344 | U | 0.16 | 0.02 | U | 0.16 | 0.03 | U | 0.15 | 0.03 |
| 345 | C | 0.04 | 0.03 | C | 0.00 | 0.01 | C | 0.01 | 0.02 |
| 346 | G | 0.03 | 0.01 | G | 0.03 | 0.01 | G | 0.02 | 0.02 |
| 347 | C | 0.02 | 0.03 | C | 0.00 | 0.01 | C | 0.01 | 0.03 |
| 348 | G | 0.01 | 0.01 | G | 0.00 | 0.01 | G | 0.00 | 0.00 |
| 349 | G | 0.08 | 0.04 | G | 0.06 | 0.05 | G | 0.04 | 0.04 |
| 350 | A | 0.13 | 0.11 | A | 0.08 | 0.01 | A | 0.04 | 0.04 |
| 351 | C | 0.07 | 0.01 | C | 0.00 | 0.00 | C | 0.00 | 0.01 |
| 352 | C | 0.06 | 0.04 | C | 0.04 | 0.04 | C | 0.03 | 0.03 |

| **Nucleotide number** | **Mean SHAPE Reactivities**  **(from 3 independent experiments)** | | | | | | | | |
| --- | --- | --- | --- | --- | --- | --- | --- | --- | --- |
| **AD26 (WT)** | | | **AD113*i*** | | | **AD114*i*** | | |
| **Sequence** | **Mean** | **SD** | **Sequence** | **Mean** | **SD** | **Sequence** | **Mean** | **SD** |
| 353 | U | 0.15 | 0.08 | U | 0.06 | 0.05 | U | 0.05 | 0.03 |
| 354 | U | 0.06 | 0.03 | U | 0.08 | 0.02 | U | 0.09 | 0.03 |
| 355 | C | 0.33 | 0.03 | C | 0.52 | 0.10 | C | 0.55 | 0.07 |
| 356 | A | 1.75 | 0.35 | A | 1.98 | 0.03 | A | 1.94 | 0.09 |
| 357 | A | 1.83 | 0.20 | A | 2.00 | 0.00 | A | 2.00 | 0.00 |
| 358 | G | 0.92 | 0.05 | G | 1.30 | 0.12 | G | 1.26 | 0.13 |
| 359 | C | 0.39 | 0.28 | C | 0.51 | 0.17 | C | 0.40 | 0.12 |
| 360 | C | 0.98 | 0.38 | C | 0.62 | 0.22 | C | 0.56 | 0.25 |
| 361 | A | 1.25 | 0.09 | A | 1.63 | 0.17 | A | 1.70 | 0.09 |
| 362 | G | 0.21 | 0.13 | G | 0.16 | 0.10 | G | 0.11 | 0.08 |
| 363 | G | 0.05 | 0.07 | G | 0.00 | 0.00 | G | 0.00 | 0.00 |
| 364 | A | 0.00 | 0.00 | A | 0.00 | 0.00 | A | 0.00 | 0.00 |
| 365 | G | 0.10 | 0.16 | G | 0.10 | 0.09 | G | 0.07 | 0.04 |
| 366 | A | 0.41 | 0.14 | A | 0.36 | 0.06 | A | 0.37 | 0.04 |
| 367 | U | 0.03 | 0.04 | U | 0.04 | 0.03 | U | 0.03 | 0.01 |
| 368 | U | 0.02 | 0.01 | U | 0.01 | 0.01 | U | 0.01 | 0.01 |
| 369 | C | 0.00 | 0.00 | C | 0.01 | 0.01 | C | 0.00 | 0.01 |
| 370 | G | 0.03 | 0.02 | G | 0.04 | 0.02 | G | 0.04 | 0.01 |
| 371 | C | 0.12 | 0.06 | C | 0.12 | 0.07 | C | 0.06 | 0.04 |
| 372 | C | 0.19 | 0.09 | C | 0.24 | 0.07 | C | 0.17 | 0.10 |
| 373 | G | 0.02 | 0.02 | G | 0.14 | 0.05 | G | 0.05 | 0.06 |
| 374 | A | 0.04 | 0.03 | A | 0.10 | 0.06 | A | 0.03 | 0.06 |
| 375 | G | 0.00 | 0.01 | G | 0.04 | 0.02 | G | 0.05 | 0.04 |
| 376 | G | 0.03 | 0.01 | G | 0.08 | 0.03 | G | 0.04 | 0.04 |
| 377 | G | 0.07 | 0.03 | G | 0.00 | 0.00 | G | 0.00 | 0.00 |
| 378 | A | 0.30 | 0.06 | A | 0.31 | 0.04 | A | 0.27 | 0.06 |
| 379 | C | 0.83 | 0.96 | C | 0.10 | 0.09 | C | 0.15 | 0.11 |
| 380 | A | 0.26 | 0.05 | A | 0.28 | 0.01 | A | 0.23 | 0.04 |
| 381 | G | 0.00 | 0.00 | G | 0.03 | 0.04 | G | 0.01 | 0.02 |
| 382 | U | 0.02 | 0.02 | U | 0.00 | 0.00 | U | 0.00 | 0.00 |
| 383 | C | 0.24 | 0.26 | C | 0.00 | 0.00 | C | 0.01 | 0.01 |
| 384 | A | 0.00 | 0.00 | A | 0.00 | 0.00 | A | 0.00 | 0.00 |

| **Nucleotide number** | **Mean SHAPE Reactivities**  **(from 3 independent experiments)** | | | | | | | | |
| --- | --- | --- | --- | --- | --- | --- | --- | --- | --- |
| **AD26 (WT)** | | | **AD113*i*** | | | **AD114*i*** | | |
| **Sequence** | **Mean** | **SD** | **Sequence** | **Mean** | **SD** | **Sequence** | **Mean** | **SD** |
| 385 | A | 0.08 | 0.10 | A | 0.11 | 0.05 | A | 0.07 | 0.04 |
| 386 | C | 0.54 | 0.69 | C | 0.03 | 0.06 | C | 0.04 | 0.05 |
| 387 | A | 0.14 | 0.13 | A | 0.36 | 0.05 | A | 0.31 | 0.08 |
| 388 | A | 0.22 | 0.10 | A | 0.46 | 0.02 | A | 0.41 | 0.08 |
| 389 | G | 0.02 | 0.04 | G | 0.06 | 0.02 | G | 0.06 | 0.03 |
| 390 | G | 0.02 | 0.02 | G | 0.02 | 0.01 | G | 0.02 | 0.02 |
| 391 | U | 0.13 | 0.21 | U | 0.04 | 0.03 | U | 0.08 | 0.06 |
| 392 | A | 0.03 | 0.03 | A | 0.12 | 0.02 | A | 0.13 | 0.04 |
| 393 | G | 0.02 | 0.01 | G | 0.17 | 0.23 | G | 0.11 | 0.13 |
| 394 | G | 0.00 | 0.00 | G | 0.03 | 0.04 | G | 0.25 | 0.18 |
| 395 | A | 0.01 | 0.02 | A | 0.00 | 0.00 | A | 0.18 | 0.22 |
| 396 | G | 0.01 | 0.02 | G | 0.05 | 0.05 | G | 0.10 | 0.12 |
| 397 | A | 0.01 | 0.01 | A | 0.00 | 0.00 | A | 0.01 | 0.01 |
| 398 | G | 0.00 | 0.00 | G | 0.00 | 0.00 | G | 0.03 | 0.03 |
| 399 | A | 0.10 | 0.08 | A | 0.04 | 0.05 | A | 0.15 | 0.12 |
| 400 | U | 0.36 | 0.09 | U | 0.37 | 0.28 | U | 0.29 | 0.27 |
| 401 | U | 0.97 | 0.32 | U | 0.46 | 0.13 | U | 0.27 | 0.24 |
| 402 | C | 0.13 | 0.04 | C | 0.25 | 0.20 | C | 0.01 | 0.01 |
| 403 | U | 0.00 | 0.00 | U | 0.40 | 0.23 | U | 0.06 | 0.06 |
| 404 | A | 0.00 | 0.00 | A | 0.36 | 0.11 | A | 0.09 | 0.08 |
| 405 | C | 0.00 | 0.01 | C | 0.28 | 0.06 | C | 0.01 | 0.02 |
| 406 | A | 0.02 | 0.02 | A | 0.44 | 0.25 | A | 0.09 | 0.14 |
| 407 | G | 0.00 | 0.00 | G | 0.27 | 0.13 | G | 0.10 | 0.13 |
| 408 | C | 0.15 | 0.25 | C | 0.06 | 0.10 | C | 0.01 | 0.02 |
| 409 | A | 0.08 | 0.14 | A | 0.06 | 0.05 | A | 0.06 | 0.07 |
| 410 | A | 0.07 | 0.03 | A | 0.09 | 0.04 | A | 0.01 | 0.02 |
| 411 | C | -999.00 | 0.00 | C | 0.00 | 0.01 | C | 0.00 | 0.00 |
| 412 | A | 0.05 | 0.08 | A | 0.01 | 0.01 | A | 0.10 | 0.11 |
| 413 | U | 0.02 | 0.03 | U | 0.31 | 0.31 | U | 0.90 | 0.48 |
| 414 | G | 0.09 | 0.02 | G | 0.70 | 0.21 | G | 0.65 | 0.32 |
| 415 | G | 0.38 | 0.10 | G | 0.54 | 0.04 | G | 0.82 | 0.76 |
| 416 | G | 0.45 | 0.25 | G | 0.00 | 0.00 | G | 1.26 | 0.73 |

| **Nucleotide number** | **Mean SHAPE Reactivities**  **(from 3 independent experiments)** | | | | | | | | |
| --- | --- | --- | --- | --- | --- | --- | --- | --- | --- |
| **AD26 (WT)** | | | **AD113*i*** | | | **AD114*i*** | | |
| **Sequence** | **Mean** | **SD** | **Sequence** | **Mean** | **SD** | **Sequence** | **Mean** | **SD** |
| 417 | G | 1.21 | 0.16 | G | 0.30 | 0.32 | G | 0.90 | 0.62 |
| 418 | A | 0.67 | 0.08 | A | 0.71 | 0.20 | A | 0.98 | 0.32 |
| 419 | A | 0.45 | 0.18 | A | 0.29 | 0.18 | A | 0.61 | 0.17 |
| 420 | U | 0.64 | 0.35 | U | 0.57 | 0.18 | U | 0.49 | 0.22 |
| 421 | G | 0.45 | 0.13 | G | 0.58 | 0.16 | G | 0.29 | 0.24 |
| 422 | G | 0.06 | 0.09 | G | 0.17 | 0.22 | G | 0.05 | 0.05 |
| 423 | A | 0.43 | 0.29 | A | 0.06 | 0.03 | A | 0.15 | 0.08 |
| 424 | C | 1.08 | 0.94 | C | 0.03 | 0.05 | C | 0.16 | 0.15 |
| 425 | A | 0.04 | 0.06 | A | 0.00 | 0.00 | A | 0.00 | 0.00 |
| 426 | G | 0.00 | 0.00 | G | 0.00 | 0.00 | G | 0.00 | 0.00 |
| 427 | G | 0.00 | 0.00 | G | 0.00 | 0.00 | G | 0.00 | 0.00 |
| 428 | G | 0.00 | 0.00 | G | 0.00 | 0.00 | G | 0.00 | 0.00 |
| 429 | G | 0.04 | 0.07 | G | 0.05 | 0.08 | G | 0.00 | 0.00 |
| 430 | C | 0.41 | 0.27 | C | 0.05 | 0.09 | C | 0.00 | 0.00 |
| 431 | G | 0.19 | 0.33 | G | 0.45 | 0.20 | G | 0.26 | 0.21 |
| 432 | A | 0.41 | 0.22 | A | 0.56 | 0.12 | A | 0.40 | 0.17 |
| 433 | G | 0.17 | 0.08 | G | 0.36 | 0.08 | G | 0.26 | 0.10 |
| 434 | A | 0.06 | 0.08 | A | 0.35 | 0.04 | A | 0.26 | 0.05 |
| 435 | U | 0.18 | 0.15 | U | 0.19 | 0.04 | U | 0.16 | 0.08 |
| 436 | U | 0.22 | 0.07 | U | 0.62 | 0.05 | U | 0.60 | 0.12 |
| 437 | G | 0.29 | 0.03 | G | 0.75 | 0.02 | G | 0.62 | 0.17 |
| 438 | G | 0.33 | 0.07 | G | 0.78 | 0.02 | G | 0.47 | 0.12 |
| 439 | A | 0.30 | 0.07 | A | 0.74 | 0.05 | A | 0.60 | 0.12 |
| 440 | A | 0.30 | 0.03 | A | 0.71 | 0.02 | A | 0.56 | 0.12 |
| 441 | A | 0.13 | 0.02 | A | 0.23 | 0.05 | A | 0.18 | 0.06 |
| 442 | A | 0.04 | 0.03 | A | 0.18 | 0.05 | A | 0.14 | 0.05 |
| 443 | U | 0.05 | 0.05 | U | 0.21 | 0.08 | U | 0.18 | 0.04 |
| 444 | G | 0.06 | 0.05 | G | 0.09 | 0.04 | G | 0.06 | 0.04 |
| 445 | G | 0.00 | 0.00 | G | 0.00 | 0.00 | G | 0.00 | 0.00 |
| 446 | C | 0.23 | 0.40 | C | 0.00 | 0.00 | C | 0.00 | 0.00 |
| 447 | C | -999.00 | 0.00 | C | 0.05 | 0.08 | C | 0.15 | 0.19 |
| 448 | A | 0.20 | 0.33 | A | 0.00 | 0.00 | A | 0.00 | 0.00 |

| **Nucleotide number** | **Mean SHAPE Reactivities**  **(from 3 independent experiments)** | | | | | | | | |
| --- | --- | --- | --- | --- | --- | --- | --- | --- | --- |
| **AD26 (WT)** | | | **AD113*i*** | | | **AD114*i*** | | |
| **Sequence** | **Mean** | **SD** | **Sequence** | **Mean** | **SD** | **Sequence** | **Mean** | **SD** |
| 449 | U | 0.45 | 0.02 | U | 0.21 | 0.02 | U | 0.22 | 0.08 |
| 450 | U | 1.32 | 0.52 | U | 0.59 | 0.19 | U | 0.88 | 0.18 |
| 451 | A | 0.80 | 0.10 | A | 0.62 | 0.19 | A | 0.52 | 0.10 |
| 452 | A | 0.82 | 0.16 | A | 0.66 | 0.14 | A | 0.57 | 0.17 |
| 453 | G | 1.01 | 0.15 | G | 0.65 | 0.09 | G | 0.81 | 0.17 |
| 454 | A | 1.05 | 0.18 | A | 0.40 | 0.07 | A | 0.41 | 0.09 |
| 455 | G | 0.69 | 0.11 | G | 0.33 | 0.10 | G | 0.26 | 0.06 |
| 456 | A | 1.41 | 0.10 | A | 0.69 | 0.13 | A | 0.83 | 0.13 |
| 457 | U | 0.79 | 0.08 | U | 0.31 | 0.09 | U | 0.36 | 0.08 |
| 458 | G | 1.60 | 0.14 | G | 0.48 | 0.26 | G | 0.85 | 0.12 |
| 459 | U | 2.00 | 0.00 | U | 0.03 | 0.04 | U | 1.66 | 0.34 |
| 460 | A | 0.97 | 0.19 | A | 0.70 | 0.05 | A | 0.60 | 0.20 |
| 461 | G | 0.98 | 0.17 | G | 0.67 | 0.02 | G | 0.47 | 0.15 |
| 462 | U | 1.84 | 0.27 | U | 0.00 | 0.62 | U | 0.83 | 0.31 |
| 463 | A | 0.51 | 0.38 | A | 0.37 | 0.01 | A | 0.15 | 0.10 |
| 464 | A | 0.15 | 0.27 | A | 0.33 | 0.09 | A | 0.01 | 0.01 |
| 465 | U | 0.16 | 0.07 | U | 0.25 | 0.06 | U | 0.07 | 0.06 |
| 466 | G | 0.05 | 0.08 | G | 0.16 | 0.06 | G | 0.08 | 0.06 |
| 467 | U | 0.25 | 0.44 | U | 0.00 | 0.00 | U | 0.00 | 0.00 |
| 468 | U | 0.03 | 0.03 | U | 0.00 | 0.00 | U | 0.00 | 0.00 |
| 469 | G | 0.03 | 0.05 | G | 0.00 | 0.00 | G | 0.00 | 0.00 |
| 470 | C | 0.11 | 0.20 | C | 0.00 | 0.00 | C | 0.00 | 0.00 |
| 471 | U | 0.03 | 0.05 | U | 0.08 | 0.13 | U | 0.01 | 0.02 |
| 472 | G | 0.00 | 0.00 | G | 0.00 | 0.00 | G | 0.00 | 0.00 |
| 473 | U | 0.05 | 0.09 | U | 0.00 | 0.00 | U | 0.00 | 0.00 |
| 474 | A | 0.00 | 0.00 | A | 0.00 | 0.00 | A | 0.00 | 0.00 |
| 475 | G | 0.19 | 0.10 | G | 0.00 | 0.00 | G | 0.00 | 0.00 |
| 476 | G | 1.75 | 0.17 | G | 1.00 | 0.26 | G | 0.83 | 0.18 |
| 477 | A | 1.86 | 0.24 | A | 0.60 | 0.15 | A | 0.64 | 0.07 |
| 478 | G | 1.53 | 0.46 | G | 0.27 | 0.12 | G | 0.22 | 0.14 |
| 479 | U | 2.00 | 0.00 | U | 0.83 | 0.36 | U | 0.67 | 0.17 |
| 480 | A | 0.75 | 0.09 | A | 0.53 | 0.31 | A | 0.23 | 0.06 |

| **Nucleotide number** | **Mean SHAPE Reactivities**  **(from 3 independent experiments)** | | | | | | | | |
| --- | --- | --- | --- | --- | --- | --- | --- | --- | --- |
| **AD26 (WT)** | | | **AD113*i*** | | | **AD114*i*** | | |
| **Sequence** | **Mean** | **SD** | **Sequence** | **Mean** | **SD** | **Sequence** | **Mean** | **SD** |
| 481 | G | 0.16 | 0.02 | G | 0.20 | 0.13 | G | 0.05 | 0.03 |
| 482 | G | 0.00 | 0.00 | G | 0.06 | 0.06 | G | 0.01 | 0.01 |
| 483 | G | 0.00 | 0.00 | G | 0.03 | 0.03 | G | 0.00 | 0.00 |
| 484 | G | 0.00 | 0.00 | G | 0.00 | 0.00 | G | 0.00 | 0.00 |
| 485 | G | 0.00 | 0.00 | G | 0.00 | 0.00 | G | 0.00 | 0.00 |
| 486 | G | 0.02 | 0.03 | G | 0.04 | 0.08 | G | 0.00 | 0.00 |
| 487 | A | 0.23 | 0.28 | A | 0.37 | 0.17 | A | 0.33 | 0.07 |
| 488 | A | 0.23 | 0.08 | A | 0.35 | 0.06 | A | 0.32 | 0.05 |
| 489 | G | 0.10 | 0.11 | G | 0.28 | 0.06 | G | 0.13 | 0.03 |
| 490 | A | 0.32 | 0.21 | A | 0.33 | 0.15 | A | 0.16 | 0.08 |
| 491 | G | 0.55 | 0.16 | G | 0.49 | 0.33 | G | 0.18 | 0.13 |
| 492 | U | 1.81 | 0.20 | U | 0.61 | 0.47 | U | 0.64 | 0.22 |
| 493 | A | 0.55 | 0.11 | A | 0.67 | 0.21 | A | 0.35 | 0.07 |
| 494 | A | 0.84 | 0.30 | A | 1.06 | 0.12 | A | 0.80 | 0.07 |
| 495 | A | 0.58 | 0.35 | A | 1.21 | 0.10 | A | 1.19 | 0.15 |
| 496 | A | 0.88 | 0.52 | A | 0.78 | 0.04 | A | 0.70 | 0.08 |
| 497 | A | 1.46 | 0.47 | A | 0.88 | 0.05 | A | 0.96 | 0.16 |
| 498 | A | 2.00 | 0.00 | A | 1.18 | 0.10 | A | 1.35 | 0.27 |
| 499 | U | 0.38 | 0.16 | U | 0.36 | 0.07 | U | 0.42 | 0.10 |
| 500 | U | 0.60 | 0.16 | U | 0.57 | 0.16 | U | 0.87 | 0.20 |
| 501 | U | 0.43 | 0.05 | U | 0.62 | 0.11 | U | 0.84 | 0.14 |
| 502 | G | 0.06 | 0.02 | G | 0.13 | 0.04 | G | 0.15 | 0.02 |
| 503 | G | 0.13 | 0.02 | G | 0.22 | 0.04 | G | 0.20 | 0.04 |
| 504 | A | 0.20 | 0.05 | A | 0.31 | 0.03 | A | 0.30 | 0.06 |
| 505 | G | 0.06 | 0.03 | G | 0.22 | 0.03 | G | 0.17 | 0.03 |
| 506 | A | 0.13 | 0.07 | A | 0.34 | 0.05 | A | 0.36 | 0.06 |
| 507 | A | 0.16 | 0.04 | A | 0.31 | 0.07 | A | 0.19 | 0.05 |
| 508 | G | 0.23 | 0.05 | G | 0.53 | 0.10 | G | 0.29 | 0.09 |
| 509 | G | 0.74 | 0.10 | G | 0.64 | 0.20 | G | 0.09 | 0.12 |
| 510 | G | 1.69 | 0.25 | G | 0.64 | 0.70 | G | 0.00 | 0.00 |
| 511 | A | 1.81 | 0.33 | A | 0.89 | 0.41 | A | 0.36 | 0.18 |

| **Nucleotide number** | **Mean SHAPE Reactivities**  **(From 3 independent experiments)** | | |
| --- | --- | --- | --- |
| **AD27 (Spliced *env* mRNA)** | | |
| **Sequence** | **Mean** | **SD** |
| 1 | G | -999.00 | 0.00 |
| 2 | A | -999.00 | 0.00 |
| 3 | G | -999.00 | 0.00 |
| 4 | U | -999.00 | 0.00 |
| 5 | C | -999.00 | 0.00 |
| 6 | U | -999.00 | 0.00 |
| 7 | C | -999.00 | 0.00 |
| 8 | U | -999.00 | 0.00 |
| 9 | U | -999.00 | 0.00 |
| 10 | U | -999.00 | 0.00 |
| 11 | G | -999.00 | 0.00 |
| 12 | U | -999.00 | 0.00 |
| 13 | U | -999.00 | 0.00 |
| 14 | G | -999.00 | 0.00 |
| 15 | A | -999.00 | 0.00 |
| 16 | G | -999.00 | 0.00 |
| 17 | G | -999.00 | 0.00 |
| 18 | A | -999.00 | 0.00 |
| 19 | C | -999.00 | 0.00 |
| 20 | U | -999.00 | 0.00 |
| 21 | U | -999.00 | 0.00 |
| 22 | U | -999.00 | 0.00 |
| 23 | U | -999.00 | 0.00 |
| 24 | G | 2.00 | 0.00 |
| 25 | A | 0.88 | 0.08 |
| 26 | G | 0.03 | 0.03 |
| 27 | U | 0.00 | 0.00 |
| 28 | U | 0.02 | 0.02 |
| 29 | C | 0.00 | 0.01 |
| 30 | U | 0.00 | 0.00 |
| 31 | C | 0.00 | 0.00 |

| **Nucleotide number** | **Mean SHAPE Reactivities**  **(From 3 independent experiments)** | | |
| --- | --- | --- | --- |
| **AD27 (Spliced *env* mRNA)** | | |
| **Sequence** | **Mean** | **SD** |
| 32 | C | 0.11 | 0.18 |
| 33 | C | 0.90 | 0.62 |
| 34 | U | 0.18 | 0.14 |
| 35 | U | 0.06 | 0.05 |
| 36 | G | 0.00 | 0.00 |
| 37 | A | 0.00 | 0.00 |
| 38 | G | 0.02 | 0.04 |
| 39 | G | 0.00 | 0.00 |
| 40 | C | 0.04 | 0.07 |
| 41 | U | 0.00 | 0.00 |
| 42 | C | 0.20 | 0.31 |
| 43 | C | 1.80 | 0.32 |
| 44 | C | 0.16 | 0.16 |
| 45 | A | 1.02 | 0.09 |
| 46 | C | 0.44 | 0.07 |
| 47 | A | 0.56 | 0.02 |
| 48 | G | 0.25 | 0.05 |
| 49 | A | 0.16 | 0.06 |
| 50 | U | 0.19 | 0.07 |
| 51 | A | 0.24 | 0.07 |
| 52 | C | 0.96 | 0.14 |
| 53 | A | 0.21 | 0.03 |
| 54 | A | 0.65 | 0.07 |
| 55 | U | 0.89 | 0.07 |
| 56 | A | 0.48 | 0.05 |
| 57 | A | 0.19 | 0.02 |
| 58 | A | 0.19 | 0.01 |
| 59 | U | 0.53 | 0.08 |
| 60 | A | 0.19 | 0.02 |
| 61 | U | 0.09 | 0.02 |
| 62 | U | 0.13 | 0.02 |

| **Nucleotide number** | **Mean SHAPE Reactivities**  **(From 3 independent experiments)** | | |
| --- | --- | --- | --- |
| **AD27 (Spliced *env* mRNA)** | | |
| **Sequence** | **Mean** | **SD** |
| 63 | U | 0.21 | 0.01 |
| 64 | G | 0.41 | 0.03 |
| 65 | A | 0.64 | 0.06 |
| 66 | G | 0.26 | 0.06 |
| 67 | A | 0.25 | 0.05 |
| 68 | U | 0.39 | 0.04 |
| 69 | U | 0.22 | 0.04 |
| 70 | G | 0.07 | 0.05 |
| 71 | A | 0.28 | 0.02 |
| 72 | A | 0.05 | 0.04 |
| 73 | C | 0.01 | 0.02 |
| 74 | C | 0.00 | 0.00 |
| 75 | C | 0.00 | 0.00 |
| 76 | U | 0.01 | 0.01 |
| 77 | G | 0.03 | 0.02 |
| 78 | U | 0.12 | 0.01 |
| 79 | C | 0.27 | 0.07 |
| 80 | G | 0.35 | 0.04 |
| 81 | A | 0.19 | 0.05 |
| 82 | G | 0.00 | 0.00 |
| 83 | U | 0.16 | 0.05 |
| 84 | A | 0.23 | 0.09 |
| 85 | U | 0.19 | 0.06 |
| 86 | C | 0.15 | 0.02 |
| 87 | U | 0.15 | 0.02 |
| 88 | G | 0.17 | 0.01 |
| 89 | U | 0.30 | 0.01 |
| 90 | G | 0.19 | 0.03 |
| 91 | U | 0.77 | 0.29 |
| 92 | A | 0.57 | 0.12 |
| 93 | A | 0.61 | 0.13 |

| **Nucleotide number** | **Mean SHAPE Reactivities**  **(From 3 independent experiments)** | | |
| --- | --- | --- | --- |
| **AD27 (Spliced *env* mRNA)** | | |
| **Sequence** | **Mean** | **SD** |
| 94 | U | 0.17 | 0.04 |
| 95 | C | 0.06 | 0.05 |
| 96 | U | 1.09 | 0.34 |
| 97 | U | 0.76 | 0.12 |
| 98 | U | 1.10 | 0.19 |
| 99 | U | 1.44 | 0.29 |
| 100 | U | 2.00 | 0.00 |
| 101 | U | 2.00 | 0.00 |
| 102 | A | 1.52 | 0.05 |
| 103 | C | 0.07 | 0.06 |
| 104 | C | 0.19 | 0.05 |
| 105 | U | 0.16 | 0.03 |
| 106 | G | 0.23 | 0.03 |
| 107 | U | 0.32 | 0.00 |
| 108 | G | 0.17 | 0.03 |
| 109 | A | 0.27 | 0.06 |
| 110 | G | 0.01 | 0.02 |
| 111 | G | 0.03 | 0.03 |
| 112 | U | 0.25 | 0.08 |
| 113 | C | 0.15 | 0.20 |
| 114 | U | 0.00 | 0.00 |
| 115 | C | 0.01 | 0.01 |
| 116 | G | 0.10 | 0.04 |
| 117 | G | 0.04 | 0.06 |
| 118 | A | 1.01 | 0.28 |
| 119 | A | 1.77 | 0.18 |
| 120 | U | 0.44 | 0.02 |
| 121 | C | 0.20 | 0.03 |
| 122 | C | 0.30 | 0.04 |
| 123 | G | 0.93 | 0.16 |
| 124 | G | 1.10 | 0.05 |

| **Nucleotide number** | **Mean SHAPE Reactivities**  **(From 3 independent experiments)** | | |
| --- | --- | --- | --- |
| **AD27 (Spliced *env* mRNA)** | | |
| **Sequence** | **Mean** | **SD** |
| 125 | G | 0.33 | 0.02 |
| 126 | C | 0.04 | 0.03 |
| 127 | C | 0.02 | 0.02 |
| 128 | G | 0.29 | 0.04 |
| 129 | A | 0.43 | 0.05 |
| 130 | G | 0.54 | 0.08 |
| 131 | A | 2.00 | 0.00 |
| 132 | A | 1.87 | 0.20 |
| 133 | C | 0.24 | 0.07 |
| 134 | U | 0.15 | 0.03 |
| 135 | U | 0.11 | 0.01 |
| 136 | C | 0.02 | 0.02 |
| 137 | G | 0.14 | 0.02 |
| 138 | C | 0.30 | 0.12 |
| 139 | A | 0.87 | 0.12 |
| 140 | G | 0.35 | 0.23 |
| 141 | U | 0.38 | 0.09 |
| 142 | U | 0.32 | 0.09 |
| 143 | G | 0.01 | 0.01 |
| 144 | G | 0.03 | 0.01 |
| 145 | C | 0.11 | 0.02 |
| 146 | G | 0.01 | 0.01 |
| 147 | C | 0.01 | 0.02 |
| 148 | C | 0.03 | 0.04 |
| 149 | C | 0.34 | 0.10 |
| 150 | G | 0.25 | 0.09 |
| 151 | A | 0.06 | 0.04 |
| 152 | A | 0.08 | 0.03 |
| 153 | C | 0.30 | 0.08 |
| 154 | A | 0.09 | 0.10 |
| 155 | G | 0.03 | 0.05 |

| **Nucleotide number** | **Mean SHAPE Reactivities**  **(From 3 independent experiments)** | | |
| --- | --- | --- | --- |
| **AD27 (Spliced *env* mRNA)** | | |
| **Sequence** | **Mean** | **SD** |
| 156 | G | 0.27 | 0.24 |
| 157 | G | 0.30 | 0.46 |
| 158 | A | 0.07 | 0.10 |
| 159 | C | 0.00 | 0.01 |
| 160 | U | 0.00 | 0.00 |
| 161 | U | 0.00 | 0.00 |
| 162 | G | 0.00 | 0.00 |
| 163 | A | 0.02 | 0.02 |
| 164 | U | 0.01 | 0.01 |
| 165 | U | 0.04 | 0.06 |
| 166 | G | 0.16 | 0.18 |
| 167 | A | 0.41 | 0.25 |
| 168 | G | 0.04 | 0.04 |
| 169 | A | 0.10 | 0.14 |
| 170 | G | 0.08 | 0.06 |
| 171 | U | 1.22 | 0.56 |
| 172 | G | 0.85 | 0.53 |
| 173 | A | 1.55 | 0.32 |
| 174 | U | 0.60 | 0.21 |
| 175 | U | 0.71 | 0.31 |
| 176 | G | 0.07 | 0.09 |
| 177 | A | 0.07 | 0.10 |
| 178 | G | 0.00 | 0.00 |
| 179 | G | 0.00 | 0.00 |
| 180 | A | 0.29 | 0.27 |
| 181 | A | 0.21 | 0.18 |
| 182 | G | 0.06 | 0.09 |
| 183 | U | 0.03 | 0.02 |
| 184 | G | 0.02 | 0.02 |
| 185 | A | 2.00 | 0.00 |
| 186 | A | 0.44 | 0.04 |

| **Nucleotide number** | **Mean SHAPE Reactivities**  **(From 3 independent experiments)** | | |
| --- | --- | --- | --- |
| **AD27 (Spliced *env* mRNA)** | | |
| **Sequence** | **Mean** | **SD** |
| 187 | G | 0.05 | 0.04 |
| 188 | C | 0.04 | 0.03 |
| 189 | U | 0.01 | 0.02 |
| 190 | A | 0.03 | 0.02 |
| 191 | G | 0.00 | 0.00 |
| 192 | A | 0.00 | 0.00 |
| 193 | G | 0.05 | 0.02 |
| 194 | C | 1.23 | 0.33 |
| 195 | A | 2.00 | 0.00 |
| 196 | A | 2.00 | 0.01 |
| 197 | U | 1.95 | 0.08 |
| 198 | A | 0.46 | 0.02 |
| 199 | G | 0.04 | 0.03 |
| 200 | A | 0.53 | 0.03 |
| 201 | A | 0.11 | 0.04 |
| 202 | A | 0.60 | 0.06 |
| 203 | G | 0.02 | 0.03 |
| 204 | C | 0.00 | 0.00 |
| 205 | U | 0.00 | 0.00 |
| 206 | G | 0.00 | 0.00 |
| 207 | U | 0.00 | 0.00 |
| 208 | U | 0.47 | 0.07 |
| 209 | A | 2.00 | 0.00 |
| 210 | A | 2.00 | 0.00 |
| 211 | G | 0.08 | 0.01 |
| 212 | C | 0.00 | 0.00 |
| 213 | A | 0.00 | 0.00 |
| 214 | G | 0.00 | 0.00 |
| 215 | A | 0.36 | 0.03 |
| 216 | A | 0.20 | 0.03 |
| 217 | C | 0.06 | 0.07 |

| **Nucleotide number** | **Mean SHAPE Reactivities**  **(From 3 independent experiments)** | | |
| --- | --- | --- | --- |
| **AD27 (Spliced *env* mRNA)** | | |
| **Sequence** | **Mean** | **SD** |
| 218 | U | 0.00 | 0.00 |
| 219 | C | 0.04 | 0.05 |
| 220 | C | 0.00 | 0.00 |
| 221 | U | 0.00 | 0.00 |
| 222 | G | 0.00 | 0.00 |
| 223 | C | 0.01 | 0.01 |
| 224 | U | 0.09 | 0.02 |
| 225 | G | 0.06 | 0.04 |
| 226 | A | 1.05 | 0.24 |
| 227 | C | 0.01 | 0.01 |
| 228 | C | 0.67 | 0.82 |
| 229 | U | 1.53 | 0.39 |
| 230 | A | 2.00 | 0.00 |
| 231 | A | 1.49 | 0.49 |
| 232 | A | 2.00 | 0.00 |
| 233 | U | 2.00 | 0.00 |
| 234 | A | 0.79 | 0.14 |
| 235 | G | 0.00 | 0.01 |
| 236 | G | 0.00 | 0.00 |
| 237 | G | 0.00 | 0.00 |
| 238 | A | 0.18 | 0.05 |
| 239 | A | 0.10 | 0.02 |
| 240 | G | 0.04 | 0.03 |
| 241 | C | 0.00 | 0.00 |
| 242 | A | 0.00 | 0.00 |
| 243 | G | 0.28 | 0.03 |
| 244 | U | 1.75 | 0.19 |
| 245 | A | 1.45 | 0.32 |
| 246 | G | 0.70 | 0.48 |
| 247 | C | 0.97 | 0.03 |
| 248 | A | 1.32 | 0.22 |

| **Nucleotide number** | **Mean SHAPE Reactivities**  **(From 3 independent experiments)** | | |
| --- | --- | --- | --- |
| **AD27 (Spliced *env* mRNA)** | | |
| **Sequence** | **Mean** | **SD** |
| 249 | G | 0.31 | 0.05 |
| 250 | A | 0.85 | 0.04 |
| 251 | C | 1.07 | 0.11 |
| 252 | G | 0.45 | 0.05 |
| 253 | C | 0.03 | 0.03 |
| 254 | U | 0.00 | 0.00 |
| 255 | G | 0.04 | 0.06 |
| 256 | C | 0.00 | 0.00 |
| 257 | U | 0.00 | 0.00 |
| 258 | A | 0.03 | 0.01 |
| 259 | A | 0.05 | 0.05 |
| 260 | C | 0.00 | 0.00 |
| 261 | A | 0.03 | 0.04 |
| 262 | G | 0.06 | 0.04 |
| 263 | U | 0.15 | 0.04 |
| 264 | G | 0.02 | 0.03 |
| 265 | A | 0.15 | 0.07 |
| 266 | G | 0.58 | 0.05 |
| 267 | U | 0.09 | 0.06 |
| 268 | A | 0.12 | 0.05 |
| 269 | U | 0.07 | 0.02 |
| 270 | C | 0.04 | 0.04 |
| 271 | U | 0.00 | 0.00 |
| 272 | C | 0.00 | 0.00 |
| 273 | U | 0.00 | 0.00 |
| 274 | A | 0.00 | 0.00 |
| 275 | G | 0.01 | 0.01 |
| 276 | U | 0.32 | 0.04 |
| 277 | G | 0.06 | 0.05 |
| 278 | A | 1.92 | 0.06 |
| 279 | A | 0.18 | 0.03 |

| **Nucleotide number** | **Mean SHAPE Reactivities**  **(From 3 independent experiments)** | | |
| --- | --- | --- | --- |
| **AD27 (Spliced *env* mRNA)** | | |
| **Sequence** | **Mean** | **SD** |
| 280 | G | 0.08 | 0.02 |
| 281 | C | 0.02 | 0.01 |
| 282 | G | 0.09 | 0.06 |
| 283 | G | 0.62 | 0.02 |
| 284 | A | 0.24 | 0.03 |
| 285 | C | 0.08 | 0.02 |
| 286 | U | 0.01 | 0.01 |
| 287 | C | 0.08 | 0.09 |
| 288 | G | 0.17 | 0.06 |
| 289 | A | 0.41 | 0.02 |
| 290 | G | 0.04 | 0.03 |
| 291 | C | 0.08 | 0.09 |
| 292 | U | 0.03 | 0.04 |
| 293 | C | 0.20 | 0.03 |
| 294 | A | 0.82 | 0.02 |
| 295 | U | 1.05 | 0.07 |
| 296 | A | 0.10 | 0.00 |
| 297 | A | 0.04 | 0.02 |
| 298 | U | 0.00 | 0.01 |
| 299 | C | 0.00 | 0.00 |
| 300 | A | 0.56 | 0.43 |
| 301 | A | 0.00 | 0.00 |
| 302 | G | 0.00 | 0.00 |
| 303 | U | 0.00 | 0.00 |
| 304 | C | 0.04 | 0.05 |
| 305 | A | 1.22 | 0.03 |
| 306 | U | 0.50 | 0.09 |
| 307 | U | 0.09 | 0.03 |
| 308 | G | 0.13 | 0.04 |
| 309 | U | 0.05 | 0.07 |
| 310 | U | 0.72 | 0.15 |

| **Nucleotide number** | **Mean SHAPE Reactivities**  **(From 3 independent experiments)** | | |
| --- | --- | --- | --- |
| **AD27 (Spliced *env* mRNA)** | | |
| **Sequence** | **Mean** | **SD** |
| 311 | U | 0.52 | 0.34 |
| 312 | A | 1.53 | 0.41 |
| 313 | A | 1.26 | 0.27 |
| 314 | A | 1.18 | 0.14 |
| 315 | G | 0.08 | 0.06 |
| 316 | G | 0.00 | 0.00 |
| 317 | C | 0.08 | 0.07 |
| 318 | C | 0.00 | 0.00 |
| 319 | C | 0.00 | 0.00 |
| 320 | A | 0.00 | 0.00 |
| 321 | G | 0.21 | 0.33 |
| 322 | A | 0.49 | 0.48 |
| 323 | U | 0.99 | 0.15 |
| 324 | A | 1.68 | 0.25 |
| 325 | A | 2.00 | 0.00 |
| 326 | A | 2.00 | 0.00 |
| 327 | U | 2.00 | 0.00 |
| 328 | U | 2.00 | 0.00 |
| 329 | A | 2.00 | 0.00 |
| 330 | C | 1.80 | 0.32 |
| 331 | A | 0.08 | 0.07 |
| 332 | U | 0.00 | 0.00 |
| 333 | C | 0.02 | 0.02 |
| 334 | U | 0.00 | 0.00 |
| 335 | G | 0.00 | 0.00 |
| 336 | G | 0.00 | 0.00 |
| 337 | U | 0.11 | 0.02 |
| 338 | G | 0.31 | 0.06 |
| 339 | A | 0.55 | 0.04 |
| 340 | C | 0.03 | 0.02 |
| 341 | U | 0.11 | 0.05 |

| **Nucleotide number** | **Mean SHAPE Reactivities**  **(From 3 independent experiments)** | | |
| --- | --- | --- | --- |
| **AD27 (Spliced *env* mRNA)** | | |
| **Sequence** | **Mean** | **SD** |
| 342 | C | 0.11 | 0.02 |
| 343 | U | 0.06 | 0.09 |
| 344 | U | 0.11 | 0.06 |
| 345 | C | 0.00 | 0.01 |
| 346 | G | 0.03 | 0.02 |
| 347 | C | 0.00 | 0.00 |
| 348 | G | 0.00 | 0.00 |
| 349 | G | 0.05 | 0.03 |
| 350 | A | 0.09 | 0.14 |
| 351 | C | 0.09 | 0.04 |
| 352 | C | 0.04 | 0.04 |
| 353 | U | 0.08 | 0.12 |
| 354 | U | 0.05 | 0.05 |
| 355 | C | 0.19 | 0.05 |
| 356 | A | 1.97 | 0.05 |
| 357 | A | 1.85 | 0.13 |
| 358 | G | 0.78 | 0.08 |
| 359 | C | 0.29 | 0.04 |
| 360 | C | 0.77 | 0.30 |
| 361 | A | 1.34 | 0.08 |
| 362 | G | 0.01 | 0.01 |
| 363 | G | 0.00 | 0.00 |
| 364 | A | 0.00 | 0.00 |
| 365 | G | 0.00 | 0.00 |
| 366 | A | 0.46 | 0.04 |
| 367 | U | 0.00 | 0.00 |
| 368 | U | 0.00 | 0.00 |
| 369 | C | 0.00 | 0.00 |
| 370 | G | 0.00 | 0.01 |
| 371 | C | 0.18 | 0.03 |
| 372 | C | 0.35 | 0.19 |

| **Nucleotide number** | **Mean SHAPE Reactivities**  **(From 3 independent experiments)** | | |
| --- | --- | --- | --- |
| **AD27 (Spliced *env* mRNA)** | | |
| **Sequence** | **Mean** | **SD** |
| 373 | G | 0.01 | 0.02 |
| 374 | A | 0.03 | 0.05 |
| 375 | G | 0.04 | 0.04 |
| 376 | G | 0.04 | 0.03 |
| 377 | G | 0.05 | 0.02 |
| 378 | A | 0.33 | 0.08 |
| 379 | C | 0.41 | 0.08 |
| 380 | A | 0.15 | 0.02 |
| 381 | G | 0.02 | 0.02 |
| 382 | U | 0.02 | 0.02 |
| 383 | C | 0.15 | 0.09 |
| 384 | A | 0.10 | 0.09 |
| 385 | A | 0.41 | 0.06 |
| 386 | C | 0.56 | 0.44 |
| 387 | A | 0.35 | 0.15 |
| 388 | A | 0.77 | 0.15 |
| 389 | G | 0.25 | 0.04 |
| 390 | A | 0.51 | 0.09 |
| 391 | A | 0.32 | 0.05 |
| 392 | C | 0.14 | 0.05 |
| 393 | G | 0.09 | 0.02 |
| 394 | C | 0.01 | 0.01 |
| 395 | C | 0.02 | 0.03 |
| 396 | U | 0.60 | 0.14 |
| 397 | G | 0.93 | 0.09 |
| 398 | C | 0.20 | 0.19 |
| 399 | U | 0.42 | 0.06 |
| 400 | G | 0.29 | 0.04 |
| 401 | A | 0.94 | 0.10 |
| 402 | U | 0.35 | 0.08 |
| 403 | U | 0.44 | 0.16 |

| **Nucleotide number** | **Mean SHAPE Reactivities**  **(From 3 independent experiments)** | | |
| --- | --- | --- | --- |
| **AD27 (Spliced *env* mRNA)** | | |
| **Sequence** | **Mean** | **SD** |
| 404 | U | 0.86 | 0.33 |
| 405 | A | 0.52 | 0.19 |
| 406 | G | 0.53 | 0.15 |
| 407 | A | 0.48 | 0.09 |
| 408 | G | 0.00 | 0.00 |
| 409 | G | 0.00 | 0.00 |
| 410 | U | 0.28 | 0.14 |
| 411 | C | 0.58 | 0.18 |
| 412 | A | 1.71 | 0.11 |
| 413 | U | 0.13 | 0.01 |
| 414 | U | 0.83 | 0.04 |
| 415 | C | 0.62 | 0.62 |
| 416 | A | 1.03 | 0.14 |
| 417 | A | 0.45 | 0.02 |
| 418 | U | 0.04 | 0.03 |
| 419 | C | 0.04 | 0.06 |
| 420 | C | 0.46 | 0.71 |
| 421 | A | 1.29 | 0.53 |
| 422 | A | 1.08 | 0.01 |
| 423 | G | 0.04 | 0.04 |
| 424 | C | 0.03 | 0.05 |
| 425 | C | 0.22 | 0.10 |
| 426 | C | 0.36 | 0.05 |
| 427 | A | 1.16 | 0.19 |
| 428 | G | 0.01 | 0.01 |
| 429 | C | 0.00 | 0.00 |
| 430 | U | 0.42 | 0.07 |
| 431 | G | 0.23 | 0.02 |
| 432 | G | 0.30 | 0.00 |
| 433 | A | 0.95 | 0.57 |
| 434 | A | 0.70 | 0.19 |

| **Nucleotide number** | **Mean SHAPE Reactivities**  **(From 3 independent experiments)** | | |
| --- | --- | --- | --- |
| **AD27 (Spliced *env* mRNA)** | | |
| **Sequence** | **Mean** | **SD** |
| 435 | C | 0.00 | 0.00 |
| 436 | C | 0.36 | 0.38 |
| 437 | U | 1.26 | 0.25 |
| 438 | G | 0.93 | 0.16 |
| 439 | U | 1.54 | 0.37 |
| 440 | U | 0.56 | 0.01 |
| 441 | A | 0.52 | 0.04 |
| 442 | U | 1.49 | 0.24 |
| 443 | G | 0.10 | 0.07 |
| 444 | G | 0.02 | 0.03 |
| 445 | U | 0.07 | 0.09 |
| 446 | C | 0.07 | 0.06 |
| 447 | G | 0.03 | 0.04 |
| 448 | G | 0.12 | 0.02 |
| 449 | G | 0.51 | 0.05 |
| 450 | A | 0.51 | 0.22 |
| 451 | G | 0.42 | 0.02 |
| 452 | A | 0.68 | 0.12 |
| 453 | A | 0.75 | 0.11 |
| 454 | U | 0.88 | 0.30 |
| 455 | U | 0.62 | 0.38 |
| 456 | A | 1.00 | 0.09 |
| 457 | U | 0.72 | 0.28 |
| 458 | G | 0.62 | 0.25 |
| 459 | A | 0.18 | 0.10 |
| 460 | A | 0.07 | 0.04 |
| 461 | U | 0.37 | 0.16 |
| 462 | G | 0.19 | 0.15 |
| 463 | G | 0.14 | 0.06 |
| 464 | A | 0.14 | 0.06 |
| 465 | A | 0.17 | 0.05 |

| **Nucleotide number** | **Mean SHAPE Reactivities**  **(From 3 independent experiments)** | | |
| --- | --- | --- | --- |
| **AD27 (Spliced *env* mRNA)** | | |
| **Sequence** | **Mean** | **SD** |
| 466 | G | 0.02 | 0.02 |
| 467 | A | 0.15 | 0.08 |
| 468 | C | 0.00 | 0.00 |
| 469 | A | 0.10 | 0.06 |
| 470 | U | 0.36 | 0.17 |
| 471 | A | 0.17 | 0.07 |
| 472 | A | 0.17 | 0.05 |
| 473 | U | 0.18 | 0.04 |
| 474 | A | 0.03 | 0.01 |
| 475 | G | 0.12 | 0.05 |
| 476 | U | 0.68 | 0.53 |
| 477 | A | 0.79 | 0.60 |
| 478 | U | 0.75 | 0.11 |
| 479 | U | 0.78 | 0.02 |
| 480 | A | 0.47 | 0.06 |
| 481 | U | 0.02 | 0.01 |
| 482 | U | 0.01 | 0.02 |
| 483 | C | 0.00 | 0.00 |
| 484 | A | 0.00 | 0.00 |
| 485 | A | 0.13 | 0.07 |
| 486 | U | 0.21 | 0.06 |
| 487 | A | 0.16 | 0.03 |
| 488 | G | 0.01 | 0.01 |
| 489 | G | 0.01 | 0.02 |
| 490 | G | 0.02 | 0.03 |
| 491 | U | 0.08 | 0.08 |
| 492 | C | 0.01 | 0.02 |
| 493 | A | 0.51 | 0.26 |
| 494 | C | 0.02 | 0.03 |
| 495 | U | 0.00 | 0.00 |
| 496 | G | 0.00 | 0.00 |

| **Nucleotide number** | **Mean SHAPE Reactivities**  **(From 3 independent experiments)** | | |
| --- | --- | --- | --- |
| **AD27 (Spliced *env* mRNA)** | | |
| **Sequence** | **Mean** | **SD** |
| 497 | A | 0.06 | 0.10 |
| 498 | G | 0.01 | 0.02 |
| 499 | A | 0.14 | 0.08 |
| 500 | A | 0.10 | 0.08 |
| 501 | A | 0.12 | 0.09 |
| 502 | C | 0.00 | 0.00 |
| 503 | U | 0.01 | 0.01 |
| 504 | A | 0.07 | 0.06 |
| 505 | G | 0.34 | 0.16 |
| 506 | A | 0.50 | 0.13 |
| 507 | A | 0.60 | 0.10 |
| 508 | A | 0.76 | 0.16 |
| 509 | A | 1.03 | 0.22 |
| 510 | A | 0.89 | 0.11 |
| 511 | G | 0.72 | 0.18 |

**Supplemental Table S2.** Mean SHAPE reactivities of first 511 nucleotides of wild type unspliced RNA (AD26), 5’ U85CUG88 3’ mutant clones (AD109*i*, AD111*i*, AD113*i*, AD114*i*) and spliced *env* mRNA (AD27) from three independent experiments. The yellow highlighted region shows mutation introduced in 5’U85CUG88 in each clone.
