# Supplementary material
Source: HighWire-hosted journal article supplement (doi:10.1101/rna.079840.123)

# Supplemental Figure 1

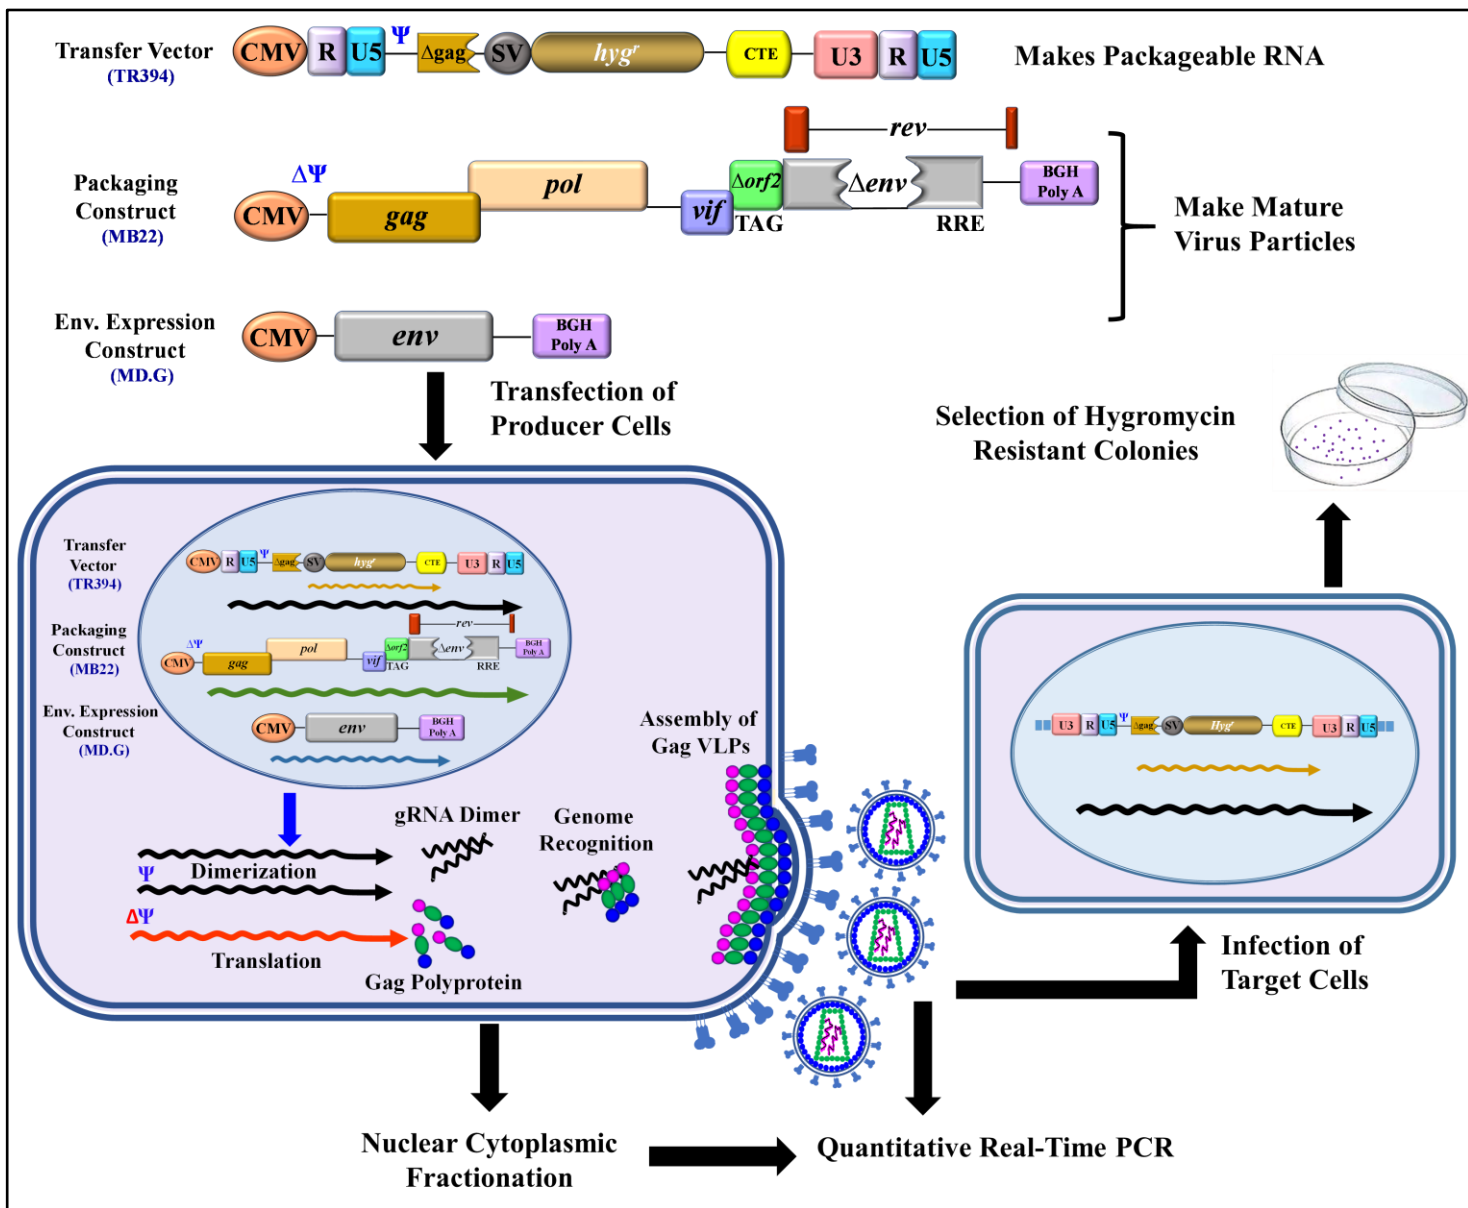

## Supplemental Figure 2

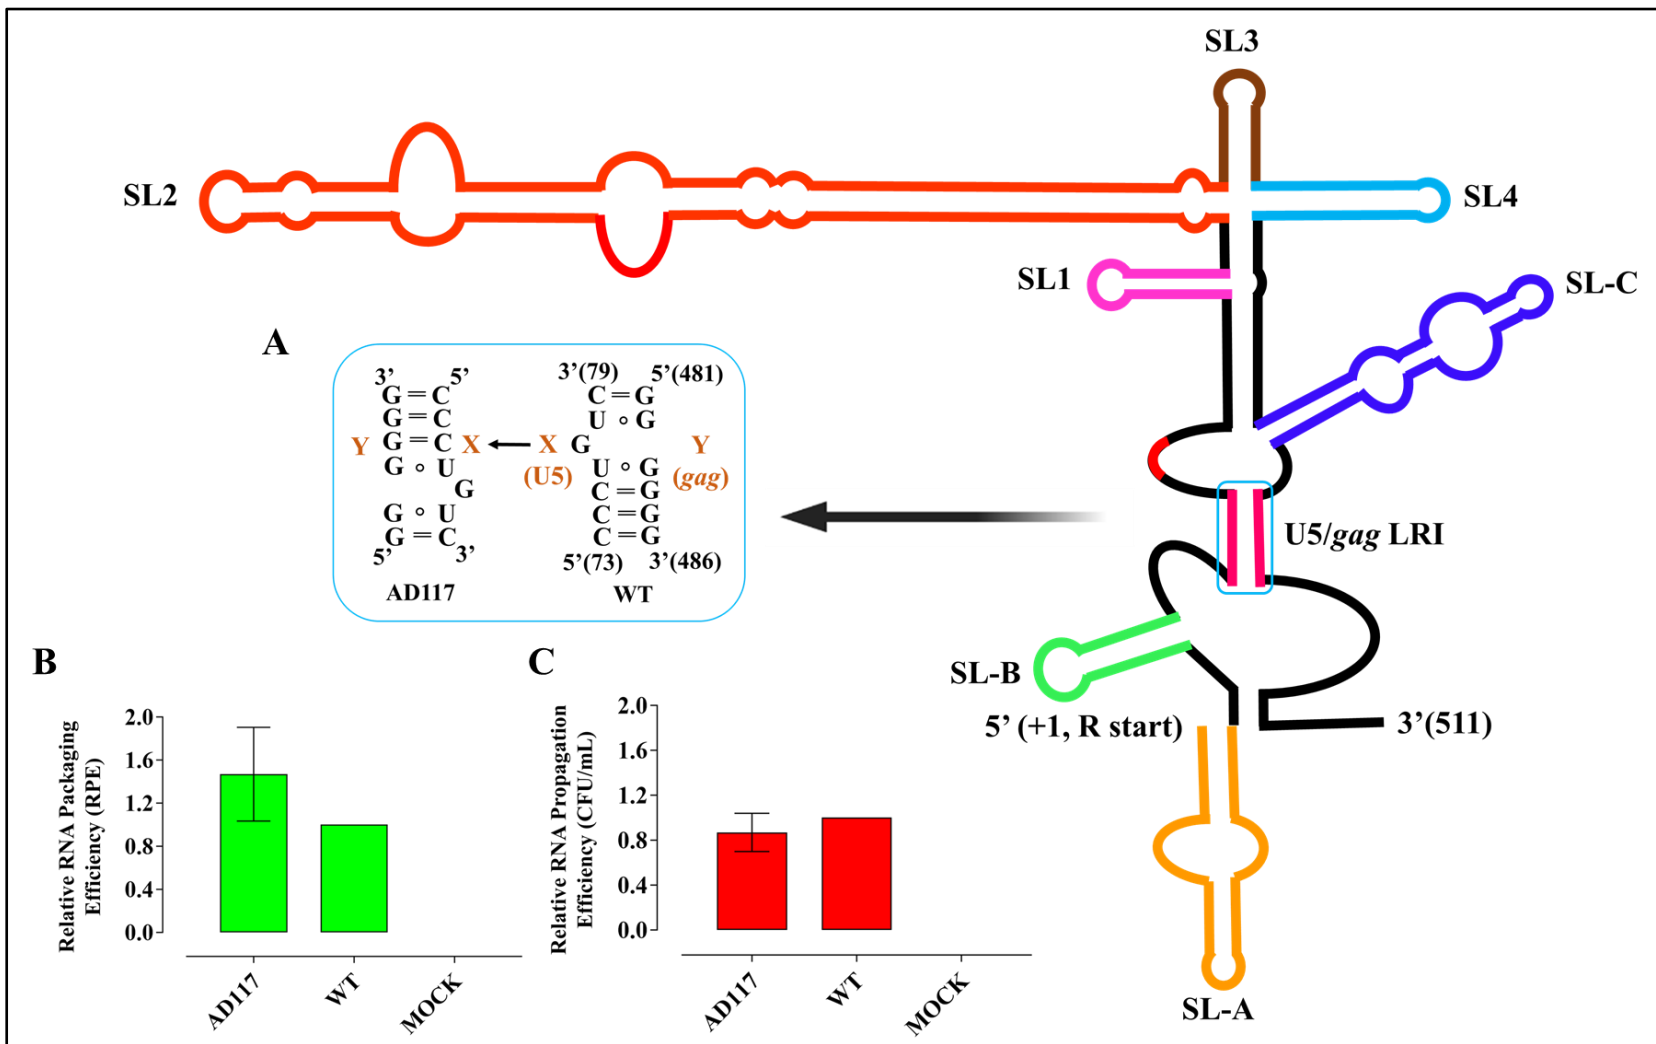

## Supplemental Figure 3

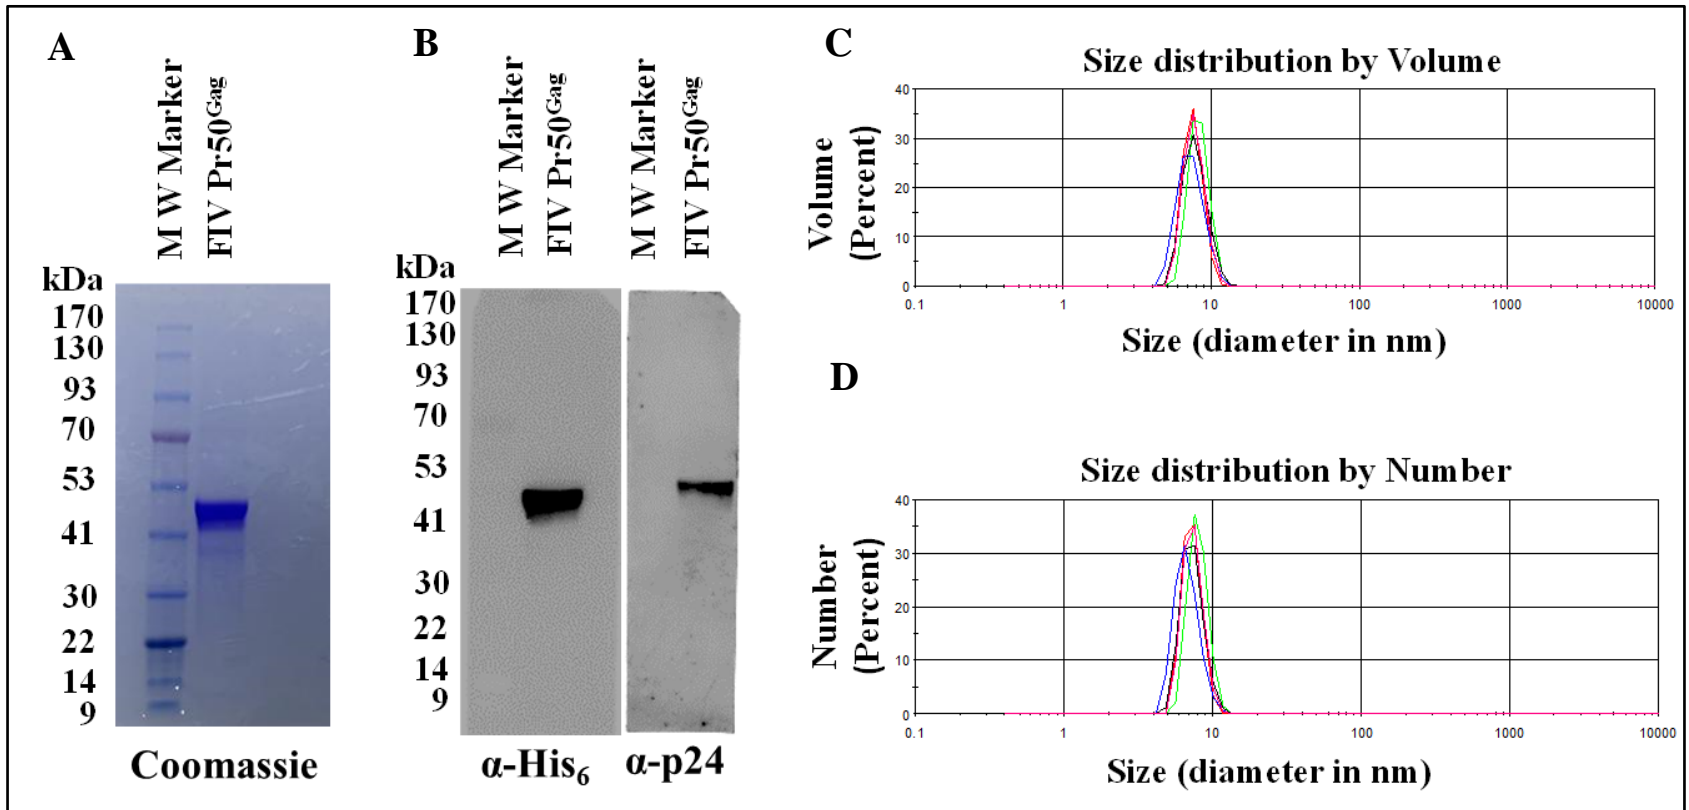

Supplement: Supplemental_Figs.pdf [file Supplemental_Figs.pdf]
